# Supplementary material for: Alkaloids from the Mangrove-Derived Actinomycete Jishengella endophytica 161111
Source: PubMed Central journal article supplement (PMC3917282; doi:10.3390/md12010477), 2014-01-21
Supplement: marinedrugs-12-00477-s001.pdf [file marinedrugs-12-00477-s001.pdf]

## Supplementary Information

**S1.** The Physicochemical Data of Compounds **7–13**.

**Figure S1.** The  $^1\text{H}$  NMR (600 MHz, MeOH- $d_4$ ) spectrum of compound **1**.

**Figure S2.** The  $^1\text{H}$  NMR (600 MHz, MeOH- $d_4$ ) spectrum of compound **1** at  $-4\text{ }^\circ\text{C}$ .

**Figure S3.** The DEPTQ (150 MHz, MeOH- $d_4$ ) spectrum of compound **1**.

**Figure S4.** The  $^1\text{H}$ - $^1\text{H}$  COSY (600 MHz, MeOH- $d_4$ ) spectrum of compound **1**.

**Figure S5.** The HSQC (150 MHz, MeOH- $d_4$ ) spectrum of compound **1**.

**Figure S6.** The HMBC (150 MHz, MeOH- $d_4$ ) spectrum of compound **1**.

**Figure S7.** The NOESY (600 MHz, MeOH- $d_4$ ) spectrum of compound **1**.

**Figure S8.** The NOESY (600 MHz, MeOH- $d_4$ ) spectrum of compound **1** at  $-4\text{ }^\circ\text{C}$ .

**Figure S9.** The  $^1\text{H}$  NMR (600 MHz, MeOH- $d_4$ ) spectrum of compound **2**.

**Figure S10.** The  $^1\text{H}$  NMR (600 MHz, MeOH- $d_4$ ) spectrum of compound **2** at  $-4\text{ }^\circ\text{C}$ .

**Figure S11.** The DEPTQ (150 MHz, MeOH- $d_4$ ) spectrum of compound **2**.

**Figure S12.** The  $^1\text{H}$ - $^1\text{H}$  COSY (600 MHz, MeOH- $d_4$ ) spectrum of compound **2**.

**Figure S13.** The HSQC (150 MHz, MeOH- $d_4$ ) spectrum of compound **2**.

**Figure S14.** The HMBC (150 MHz, MeOH- $d_4$ ) spectrum of compound **2**.

**Figure S15.** The NOESY (600 MHz, MeOH- $d_4$ ) spectrum of compound **2**.

**Figure S16.** The NOESY (600 MHz, MeOH- $d_4$ ) spectrum of compound **2** at  $-4\text{ }^\circ\text{C}$ .

**Figure S17.** The  $^1\text{H}$  NMR (600 MHz, DMSO- $d_6$ ) spectrum of compound **3**.

**Figure S18.** The  $^{13}\text{C}$  NMR (150 MHz, DMSO- $d_6$ ) spectrum of compound **3**.

**Figure S19.** The DEPT (150 MHz, DMSO- $d_6$ ) spectrum of compound **3**.

**Figure S20.** The  $^1\text{H}$ - $^1\text{H}$  COSY (600 MHz, DMSO- $d_6$ ) spectrum of compound **3**.

**Figure S21.** The HSQC (150 MHz, DMSO- $d_6$ ) spectrum of compound **3**.

**Figure S22.** The HMBC (150 MHz, DMSO- $d_6$ ) spectrum of compound **3**.

**Figure S23.** The  $^1\text{H}$  NMR ((600 MHz, DMSO- $d_6$ ) spectrum of compound **4**.

**Figure S24.** The  $^{13}\text{C}$  NMR (150 MHz, DMSO- $d_6$ ) spectrum of compound **4**.

**Figure S25.** The DEPT (150 MHz, DMSO- $d_6$ ) spectrum of compound **4**.

**Figure S26.** The  $^1\text{H}$  NMR (600 MHz, DMSO- $d_6$ ) spectrum of compound **5**.

**Figure S27.** The DEPTQ (150 MHz, DMSO- $d_6$ ) spectrum of compound **5**.

**Figure S28.** The  $^1\text{H}$  NMR (150 MHz, DMSO- $d_6$ ) spectrum of compound **6**.

**Figure S29.** The  $^{13}\text{C}$  NMR (600 MHz, DMSO- $d_6$ ) spectrum of compound **6**.

**Figure S30.** The DEPT (150 MHz, DMSO- $d_6$ ) spectrum of compound **6**.

**Table S1.** Anti-H1N1 virus activities of **1–13**.

**Table S2.** The 2D NMR data for compounds **1–3**.

**S1. The Physicochemical Data of the Known Compounds 7–13**

**Compound 7:** Yellow solid;  $^1\text{H}$  NMR (600 MHz, DMSO- $d_6$ ):  $\delta$  8.83 (1H, s, H-4), 8.41 (1H, d,  $J = 7.6$  Hz, H-5), 7.34 (1H, dd,  $J = 7.6, 7.8$  Hz, H-6), 7.64 (1H, t,  $J = 7.8$  Hz, H-7), 7.81 (1H, d,  $J = 7.8$  Hz, H-8), 11.6 (1H, s, NH-9), 7.41 (1H,  $J = 3.2$  Hz, H-3'), 6.62 (1H,  $J = 3.2$  Hz, H-4'), 4.67 (2H, s, H-6'), 5.51 (1H, s, OH-6').  $^{13}\text{C}$  NMR (150 MHz, DMSO- $d_6$ ):  $\delta$  133.0 (C<sub>q</sub>, C-1), 137.6 (C<sub>q</sub>, C-3), 116.3 (CH, C-4), 130.4 (C<sub>q</sub>, C-4a), 121.5 (C<sub>q</sub>, C-4b), 122.7 (CH, C-5), 121.1 (CH, C-6), 129.5 (CH, C-7), 113.4 (CH, C-8), 141.9 (C<sub>q</sub>, C-8a), 132.5 (C<sub>q</sub>, C-9a), 167.0 (C<sub>q</sub>, C-10), 151.8 (C<sub>q</sub>, C-2'), 111.7 (CH, C-3'), 109.9 (CH, C-4'), 157.8 (C<sub>q</sub>, C-5'), 56.5 (CH<sub>2</sub>, C-6'). ESIMS  $m/z$  309.1 [M + H]<sup>+</sup>.

**Compound 8:** Pale yellow solid;  $^1\text{H}$  NMR (600 MHz, DMSO- $d_6$ ):  $\delta$  8.36 (1H, d,  $J = 5.2$  Hz, H-3), 8.06 (1H, d,  $J = 5.2$  Hz, H-4), 8.25 (1H, d,  $J = 7.9$  Hz, H-5), 7.27 (1H, t,  $J = 7.5$  Hz, H-6), 7.59 (1H, t,  $J = 7.6$  Hz, H-7), 7.76 (1H, d,  $J = 8.2$  Hz, H-8), 11.27 (1H, s, NH-9), 7.20 (1H, d,  $J = 3.2$  Hz, H-3'), 6.58 (1H, d,  $J = 3.2$  Hz, H-4'), 4.65 (2H, s, H-6'), 5.55 (1H, s, OH-6').  $^{13}\text{C}$  NMR (150 MHz, DMSO- $d_6$ ):  $\delta$  133.6 (C<sub>q</sub>, C-1), 138.7 (CH, C-3), 114.3 (CH, C-4), 130.0 (C<sub>q</sub>, C-4a), 121.1 (C<sub>q</sub>, C-4b), 122.2 (CH, C-5), 120.3 (CH, C-6), 129.0 (CH, C-7), 113.0 (CH, C-8), 141.5 (C<sub>q</sub>, C-8a), 131.0 (C<sub>q</sub>, C-9a), 152.7 (CH, C-2'), 110.2 (CH, C-3'), 109.7 (CH, C-4'), 157.2 (C<sub>q</sub>, C-5'), 56.5 (CH<sub>2</sub>, C-6'). ESIMS  $m/z$  265.1 [M + H]<sup>+</sup>.

**Compound 9:** Yellow solid;  $^1\text{H}$  NMR (600 MHz, DMSO- $d_6$ ):  $\delta$  7.08 (1H, t,  $J = 6.6$  Hz, H-3), 6.99 (1H, d,  $J = 6.6$  Hz, H-4), 8.02 (1H, d,  $J = 8.0$  Hz, H-5), 7.41 (1H, td,  $J = 8.0, 1.0$  Hz, H-6), 7.17 (1H, td,  $J = 8.0, 1.0$  Hz, H-7), 7.52 (1H, d,  $J = 8.0$  Hz, H-8), 11.90 (1H, s, NH-9).  $^{13}\text{C}$  NMR (150 MHz, DMSO- $d_6$ ):  $\delta$  156.1 (C<sub>q</sub>, C-1), 120.0 (CH, C-3), 100.2 (CH, C-4), 122.4 (C<sub>q</sub>, C-4a), 124.7 (C<sub>q</sub>, C-4b), 121.8 (CH, C-5), 126.7 (CH, C-6), 125.0 (CH, C-7), 112.9 (CH, C-8), 128.4 (C<sub>q</sub>, C-8a), 139.4 (C<sub>q</sub>, C-9a). ESIMS  $m/z$  185.1 [M + H]<sup>+</sup>.

**Compound 10:** Pale yellow solid;  $^1\text{H}$  NMR (600 MHz, Pyridine- $d_5$ ):  $\delta$  13.91 (1H, s, NH-1), 14.14 (1H, s, H-3), 8.06 (1H, s, H-6), 7.87 (1H, s, H-9), 2.34 (3H, s, H-11), 2.28 (3H, s, H-12).  $^{13}\text{C}$  NMR (150 MHz, Pyridine- $d_5$ ):  $\delta$  153.1 (C<sub>q</sub>, C-2), 163.4 (C<sub>q</sub>, C-4), 132.3 (C<sub>q</sub>, C-4a), 140.4 (C<sub>q</sub>, C-5a), 131.0 (CH, C-6), 146.1 (C<sub>q</sub>, C-7), 141.1 (C<sub>q</sub>, C-8), 128.4 (C<sub>q</sub>, C-9), 144.3 (C<sub>q</sub>, C-9a), 149.0 (C<sub>q</sub>, C-10a), 21.7 (CH<sub>3</sub>, C-11), 21.1 (CH<sub>3</sub>, C-12). ESIMS  $m/z$  243.1 [M + H]<sup>+</sup>.

**Compound 11:** Pale yellow solid;  $^1\text{H}$  NMR (600 MHz, DMSO- $d_6$ ):  $\delta$  12.14 (1H, s, NH-1), 8.22 (1H, s, H-2), 8.10 (1H, d,  $J = 7.7$  Hz, H-4), 7.23 (1H, td,  $J = 7.7, 0.9$  Hz, H-5), 7.27 (1H, td,  $J = 7.7, 0.9$  Hz, H-6), 7.52 (1H, d,  $J = 7.7$  Hz, H-7), 9.93 (1H, s, H-8).  $^{13}\text{C}$  NMR (150 MHz, DMSO- $d_6$ ):  $\delta$  139.1 (CH, C-2), 118.7 (C<sub>q</sub>, C-3), 124.6 (C<sub>q</sub>, C-3a), 121.4 (CH, C-4), 122.8 (CH, C-5), 124.1 (CH, C-6), 113.0 (CH, C-7), 137.6 (CH, C-7a), 185.7 (CH, C-8). ESIMS  $m/z$  146.1 [M + H]<sup>+</sup>.

**Compound 12:** Yellow solid;  $^1\text{H}$  NMR (600 MHz, DMSO- $d_6$ ):  $\delta$  11.93 (1H, s, NH-1), 8.32 (1H, s, H-2), 8.15 (1H, d,  $J = 7.2$  Hz, H-4), 7.17 (1H, td,  $J = 7.2, 1.2$  Hz, H-5), 7.22 (1H, td,  $J = 7.2, 1.2$  Hz, H-6), 7.46 (1H, d,  $J = 7.2$  Hz, H-7), 4.56 (2H, s, H-9).  $^{13}\text{C}$  NMR (150 MHz, DMSO- $d_6$ ):  $\delta$  133.8 (CH, C-2), 113.7 (C<sub>q</sub>, C-3), 125.9 (C<sub>q</sub>, C-3a), 121.6 (CH, C-4), 122.3 (CH, C-5), 123.3 (CH, C-6), 112.7 (CH, C-7), 136.8 (C<sub>q</sub>, C-7a), 194.9 (C<sub>q</sub>, C-8), 65.7 (CH<sub>2</sub>, C-9). ESIMS  $m/z$  176.1 [M + H]<sup>+</sup>.

**Compound 13:** Brown oil;  $^1\text{H}$  NMR (600 MHz,  $\text{DMSO-}d_6$ ):  $\delta$  12.13 (1H, s, NH-1), 6.92 (1H, d,  $J = 4$  Hz, H-3), 6.21 (1H, d,  $J = 4$  Hz, H-4), 9.41 (1H, s, H-6), 4.34 (2H, s,  $\text{H}_2$ -7), 3.22 (3H, s,  $\text{H}_3$ -8).  $^{13}\text{C}$  NMR (150 MHz,  $\text{DMSO-}d_6$ ):  $\delta$  133.2 ( $\text{C}_q$ , C-2), 121.5 (CH, C-3), 111.0 (CH, C-4), 138.4 ( $\text{C}_q$ , C-5), 179.6 ( $\text{C}_q$ , C-6), 66.5 ( $\text{CH}_2$ , C-7), 57.9 ( $\text{CH}_3$ , C-8). ESIMS  $m/z$  138.1  $[\text{M} - \text{H}]^-$ .

**Figure S1.** The  $^1\text{H}$  NMR (600 MHz,  $\text{MeOH-}d_4$ ) spectrum of compound **1**.

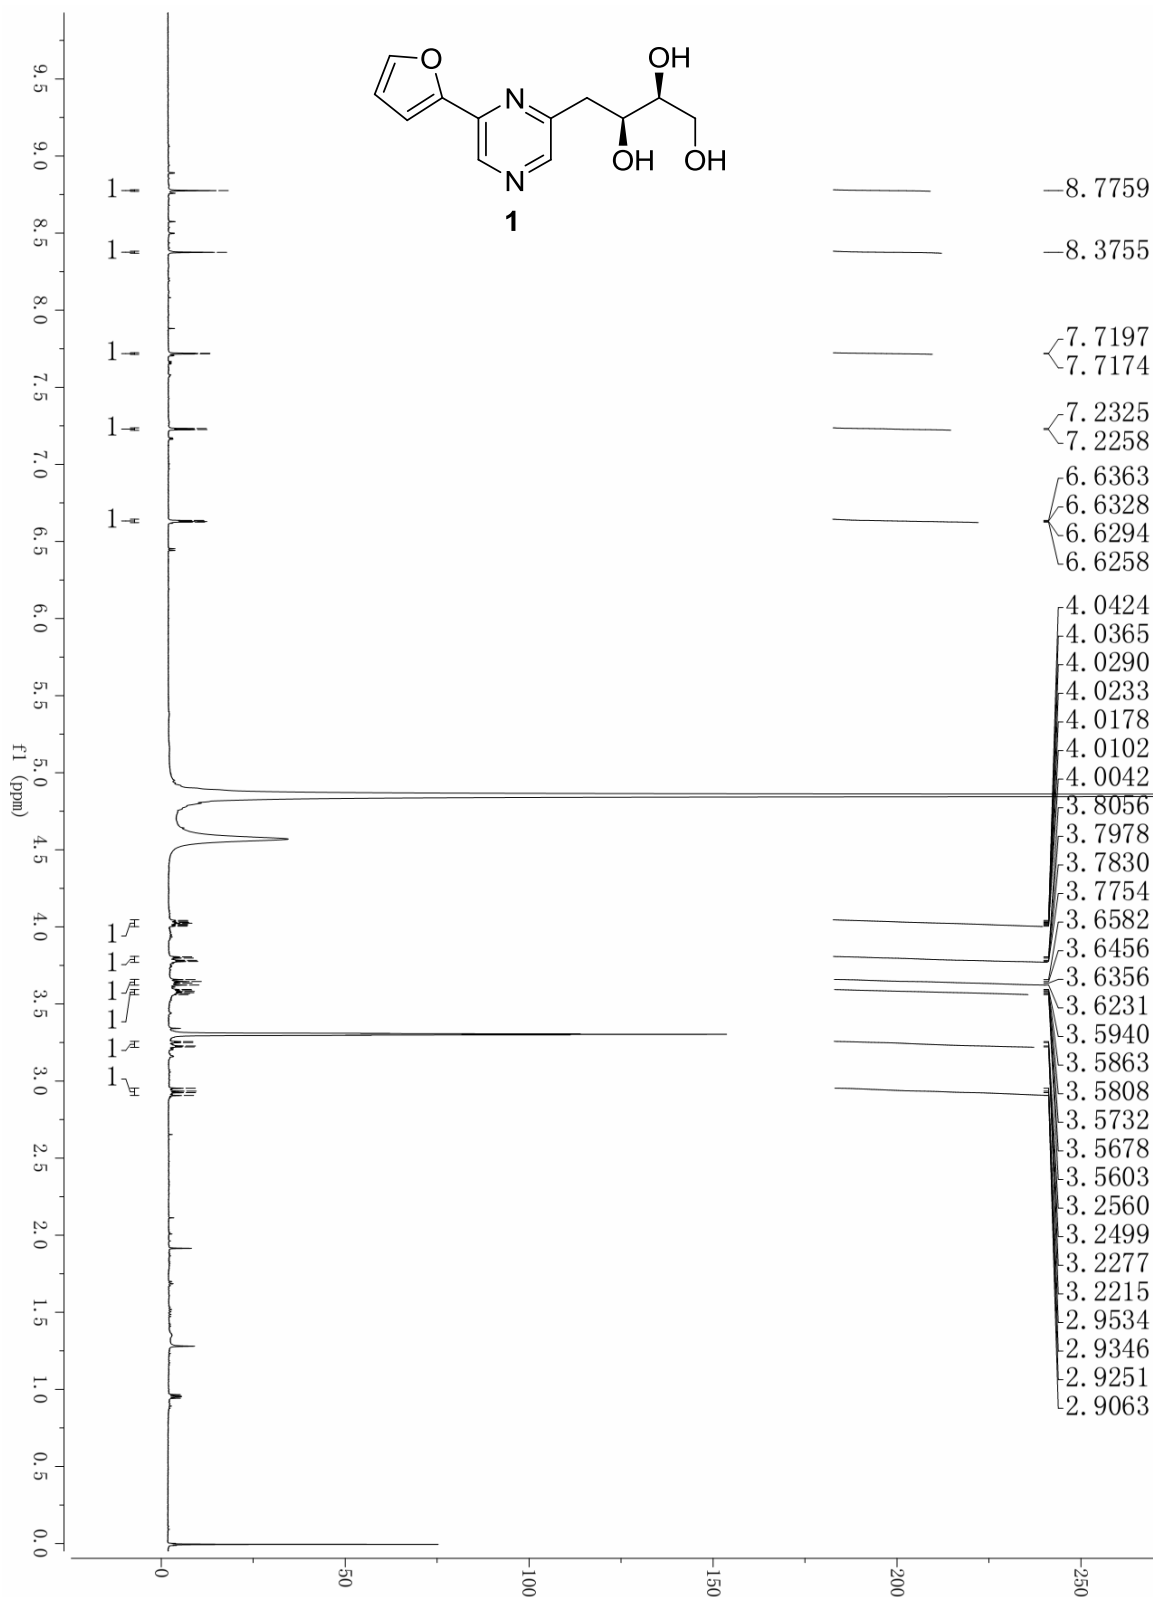

**Figure S2.** The  $^1\text{H}$  NMR (600 MHz,  $\text{MeOH-}d_4$ ) spectrum of compound **1** at  $-4\text{ }^\circ\text{C}$ .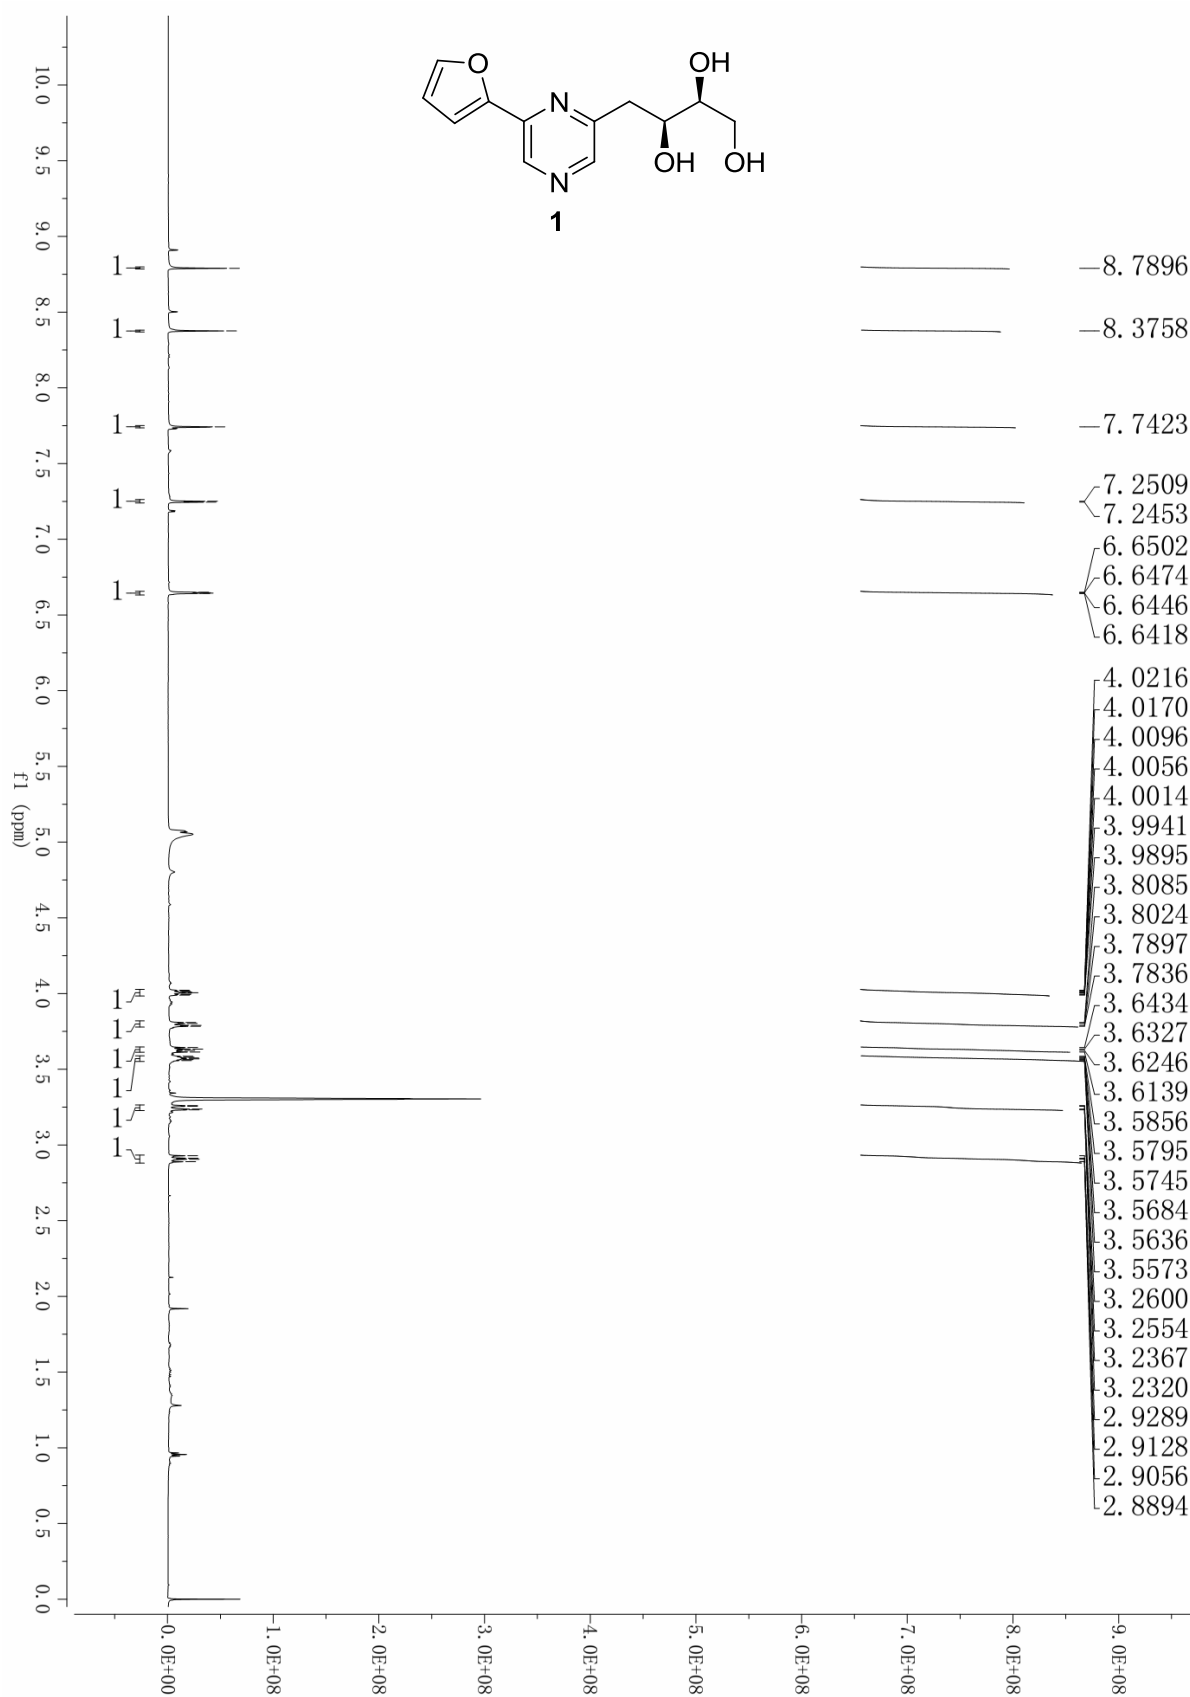

**Figure S3.** The DEPQ (150 MHz, MeOH-*d*<sub>4</sub>) spectrum of compound **1**.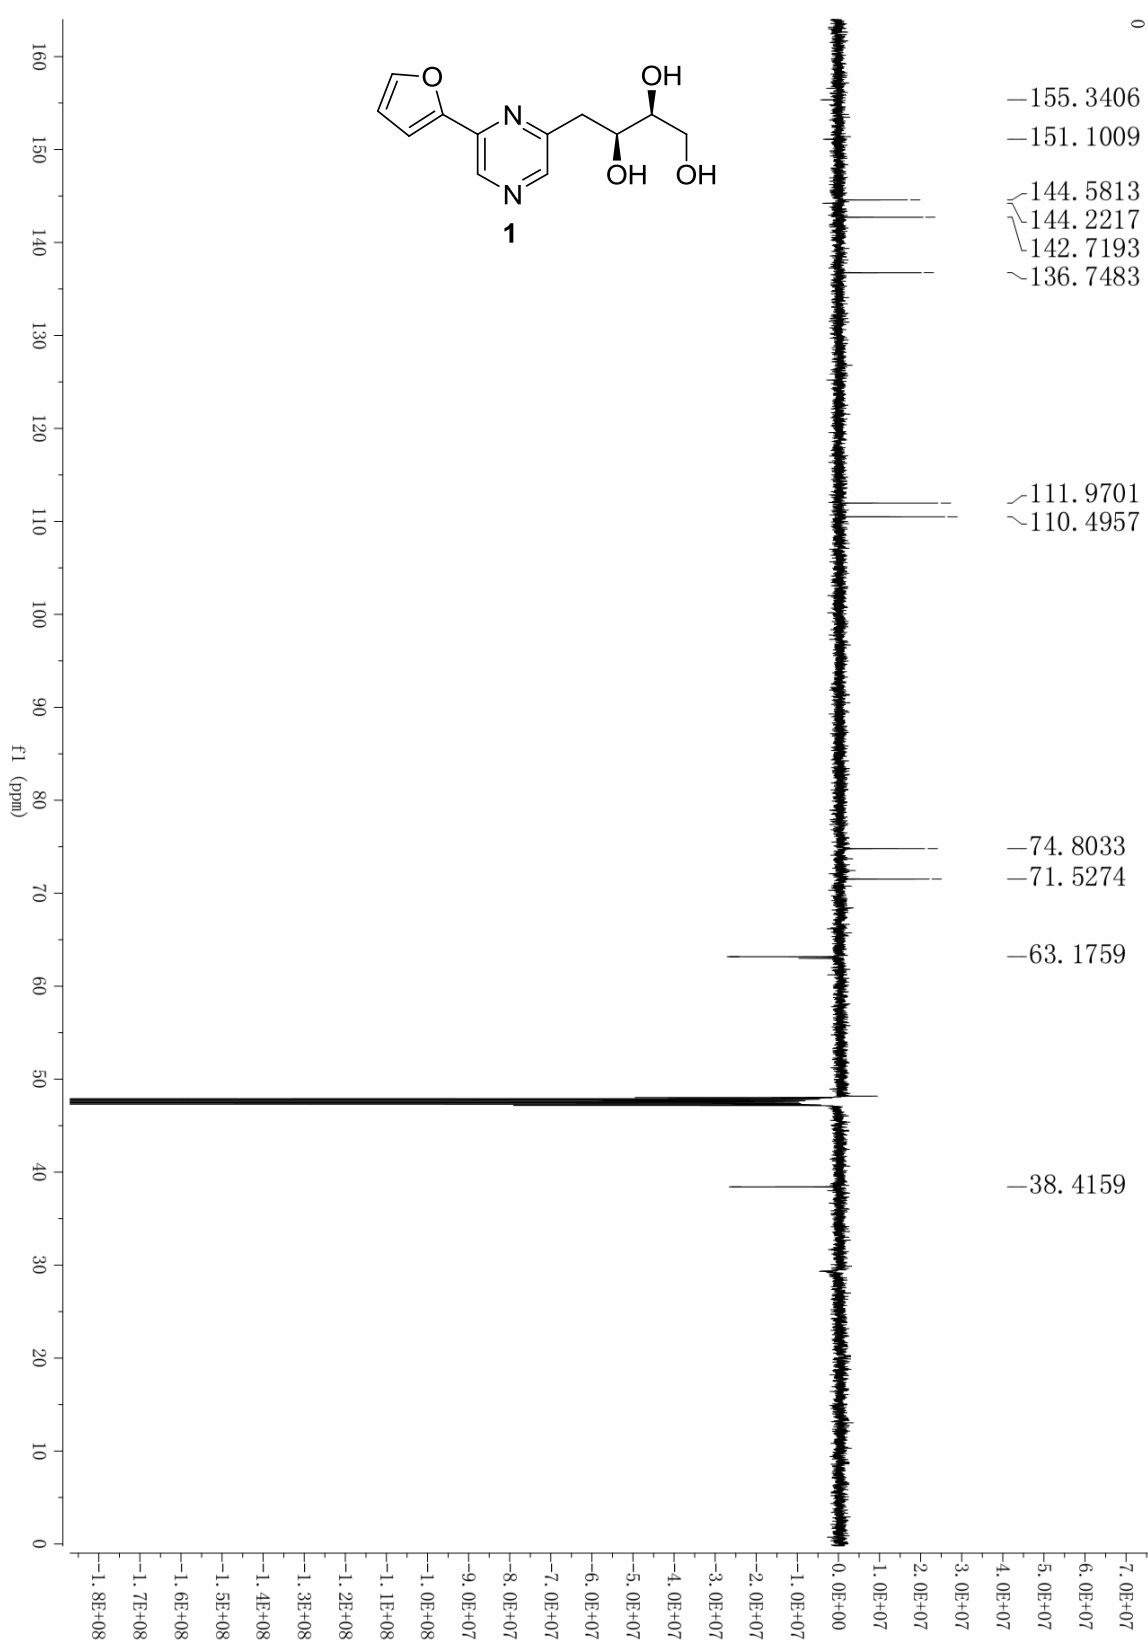

**Figure S4.** The  $^1\text{H}$ - $^1\text{H}$  COSY (600 MHz,  $\text{MeOH-}d_4$ ) spectrum of compound **1**.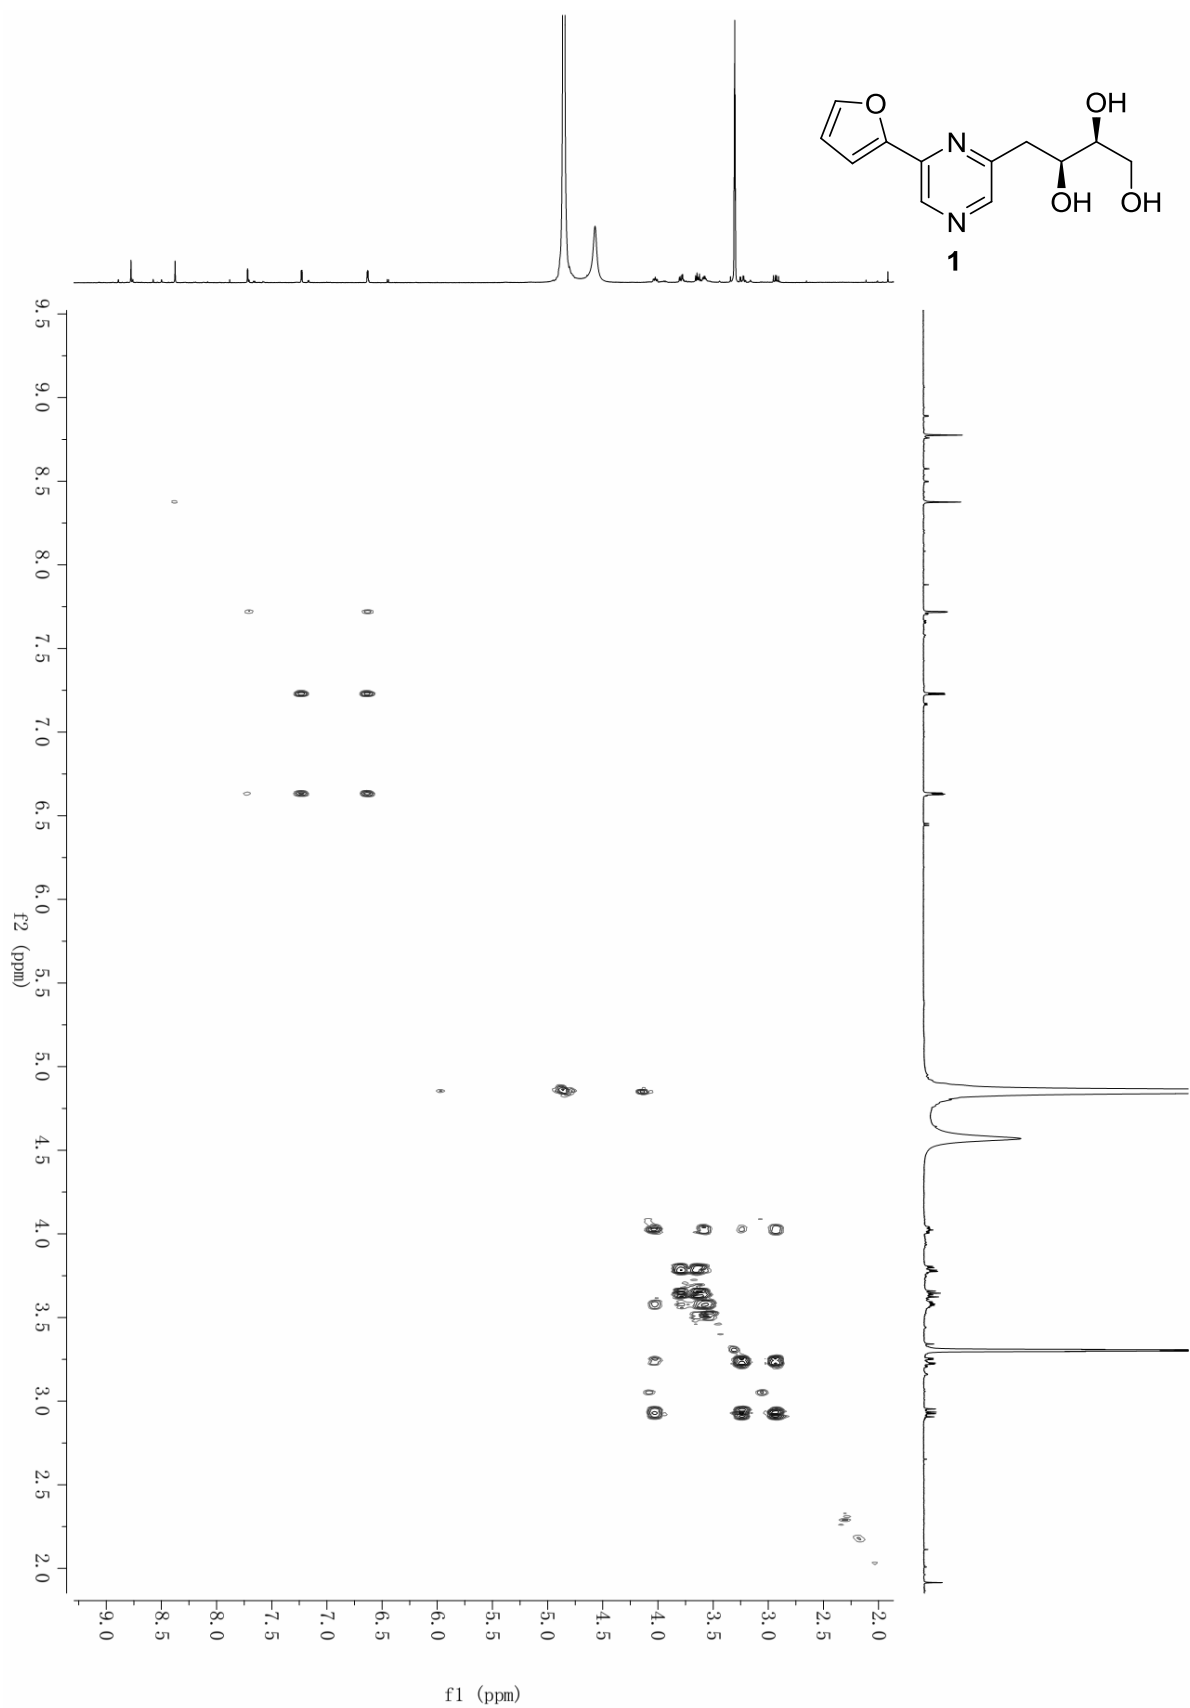

**Figure S5.** The HSQC (150 MHz, MeOH-*d*<sub>4</sub>) spectrum of compound **1**.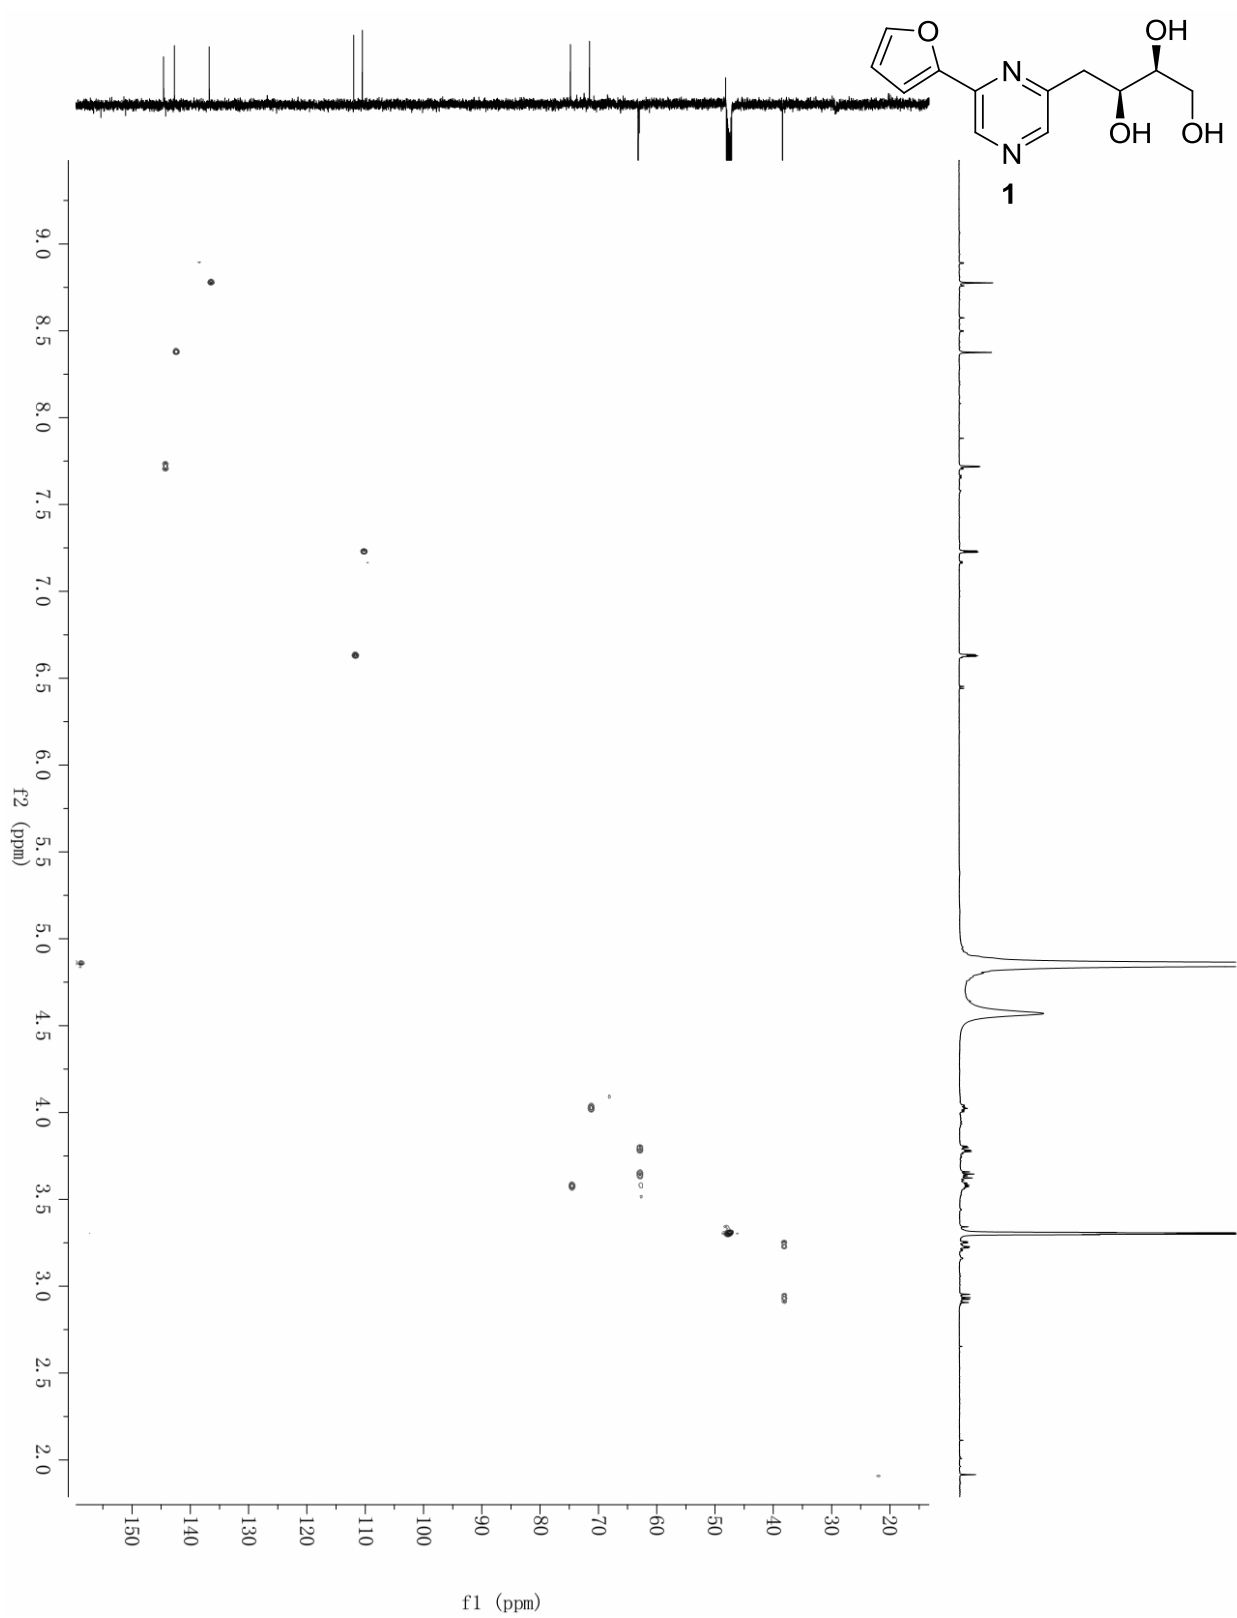

**Figure S6.** The HMBC (150 MHz, MeOH-*d*<sub>4</sub>) spectrum of compound **1**.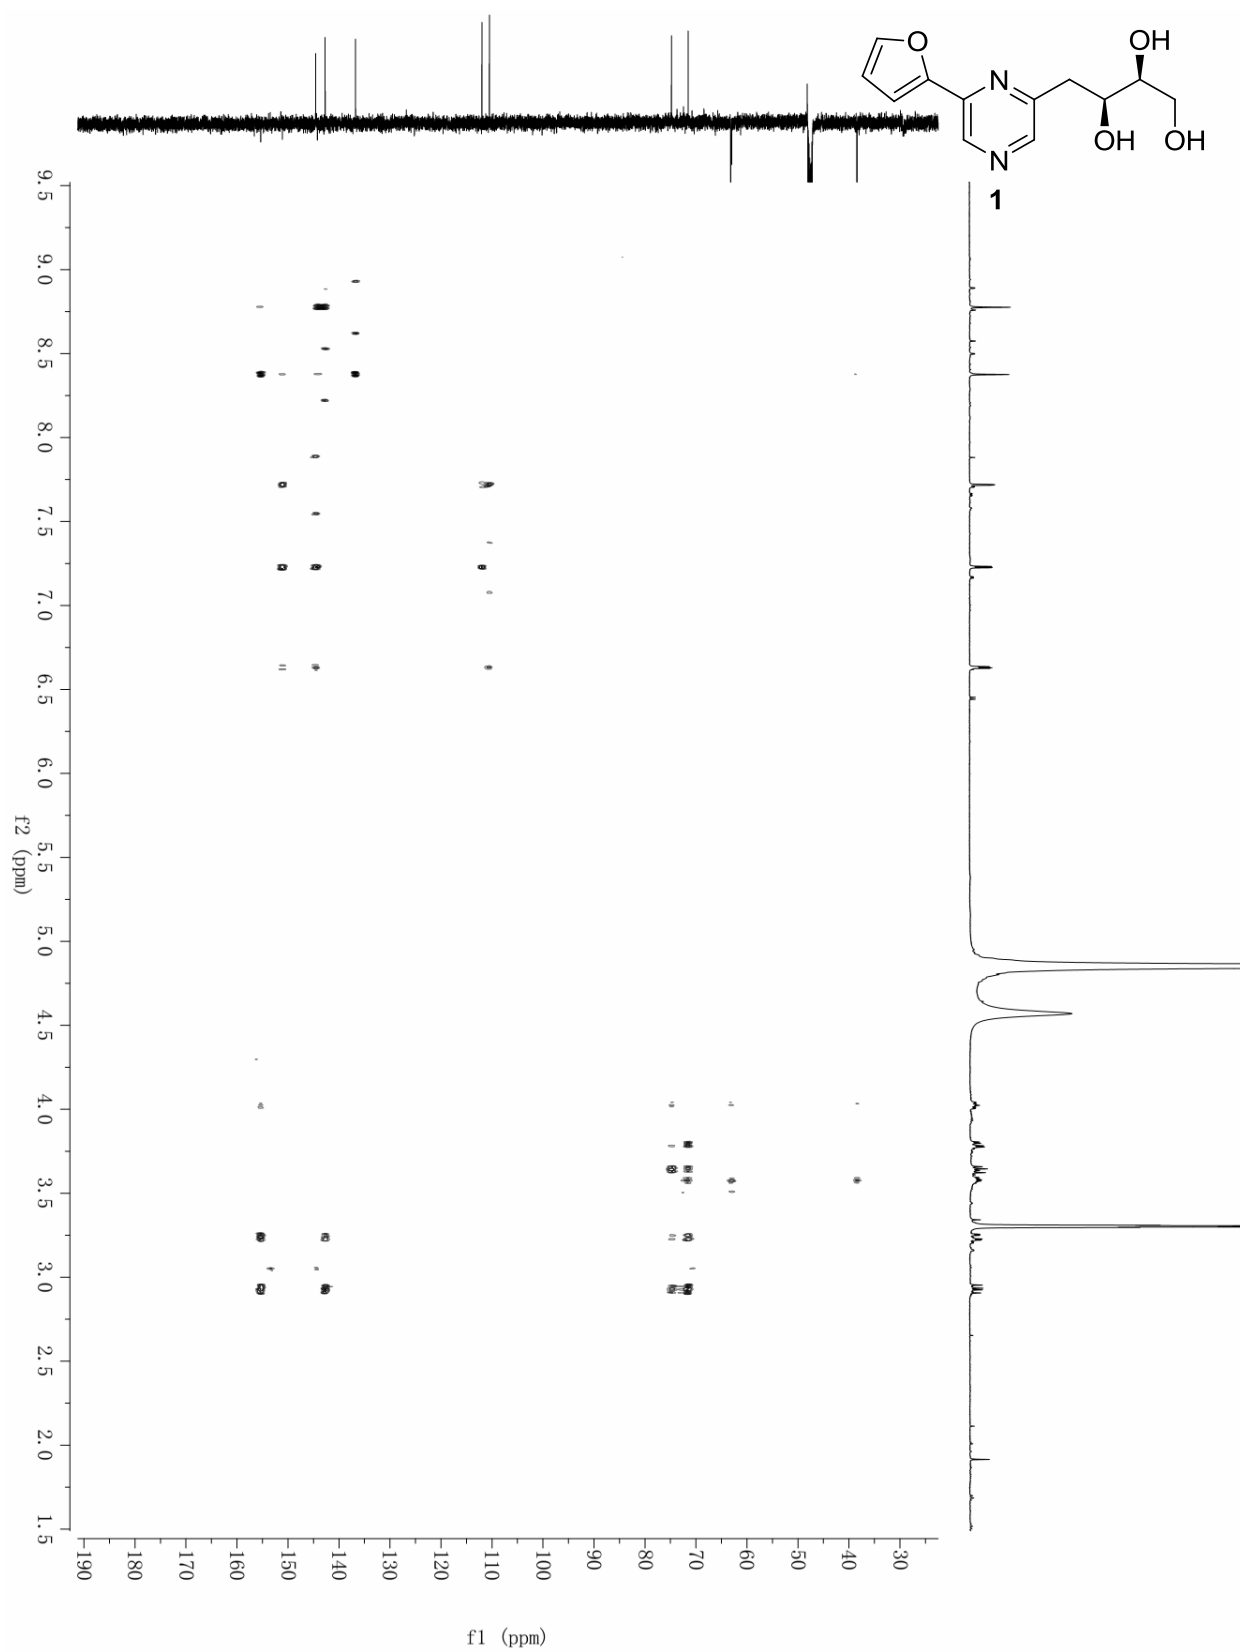



**Figure S7.** The NOESY (600 MHz, MeOH-*d*<sub>4</sub>) spectrum of compound **1**.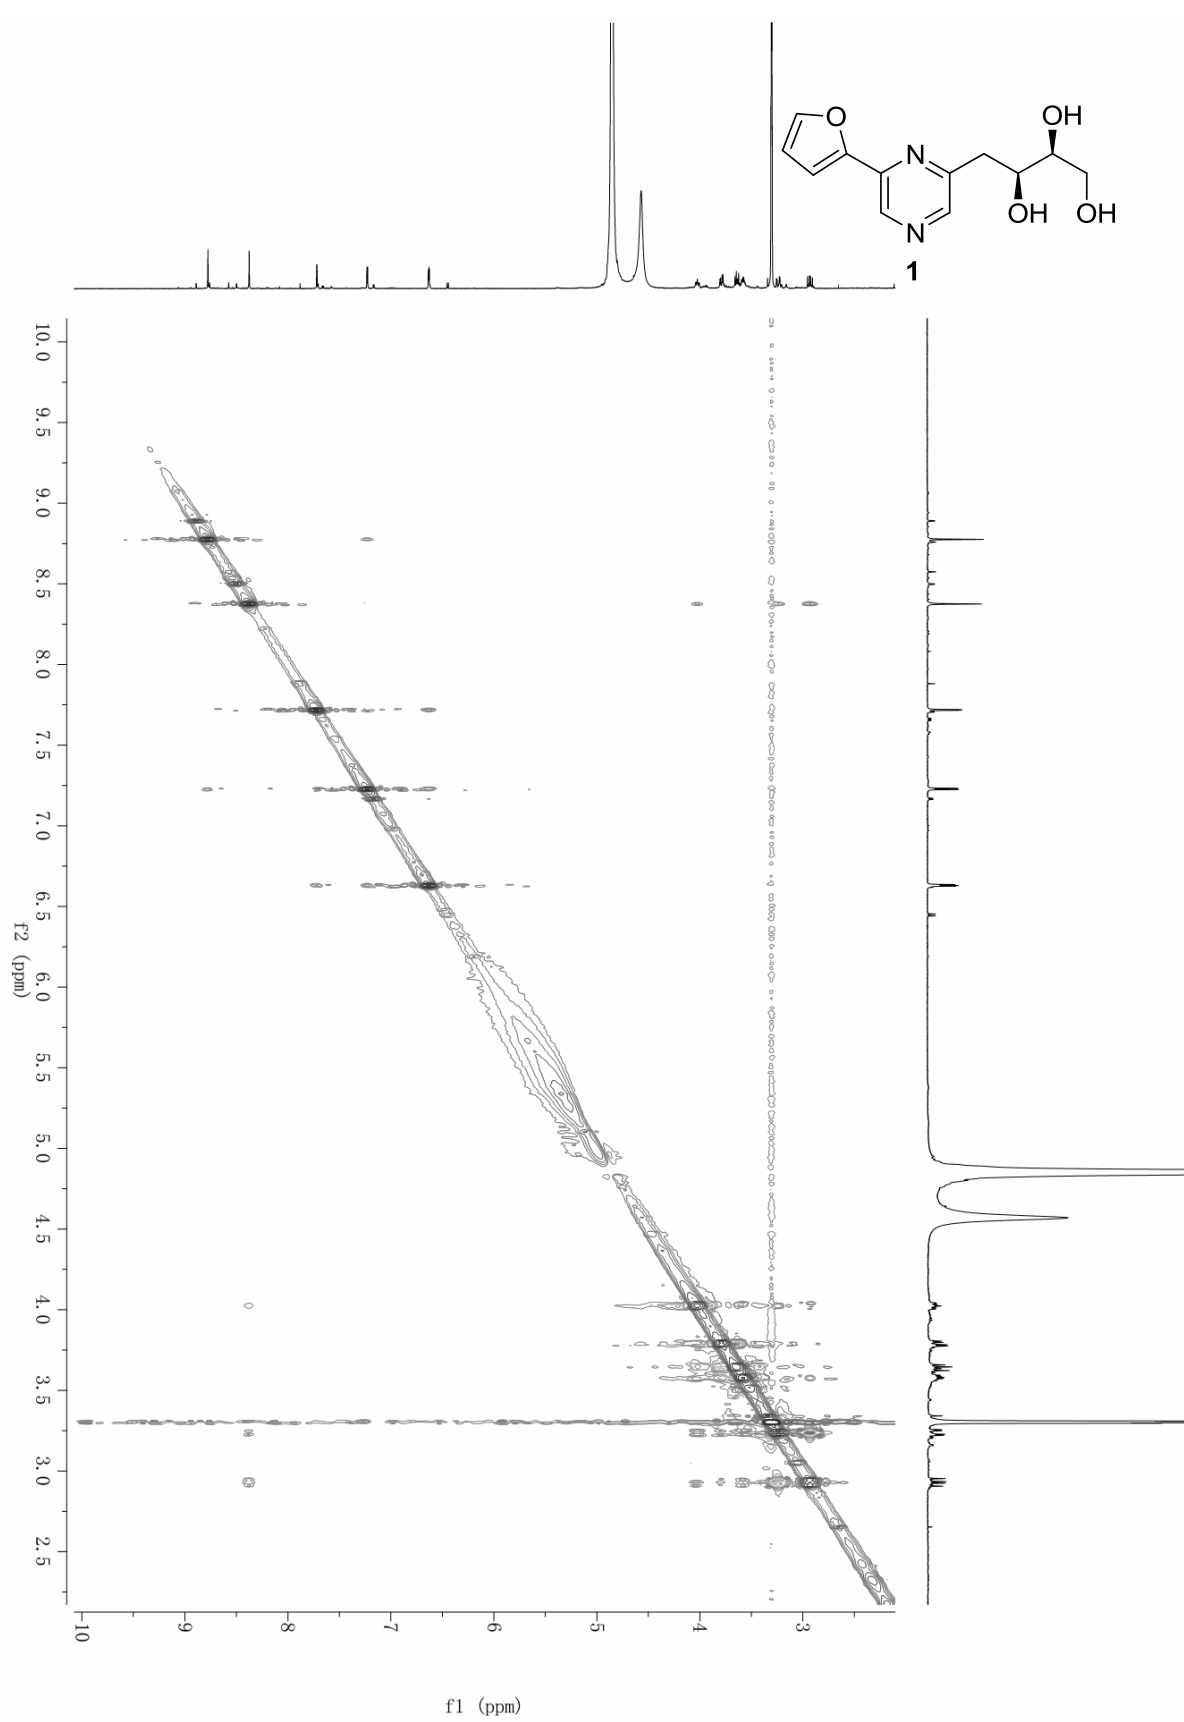

**Figure S8.** The NOESY (600 MHz, MeOH-*d*<sub>4</sub>) spectrum of compound **1** at -4 °C.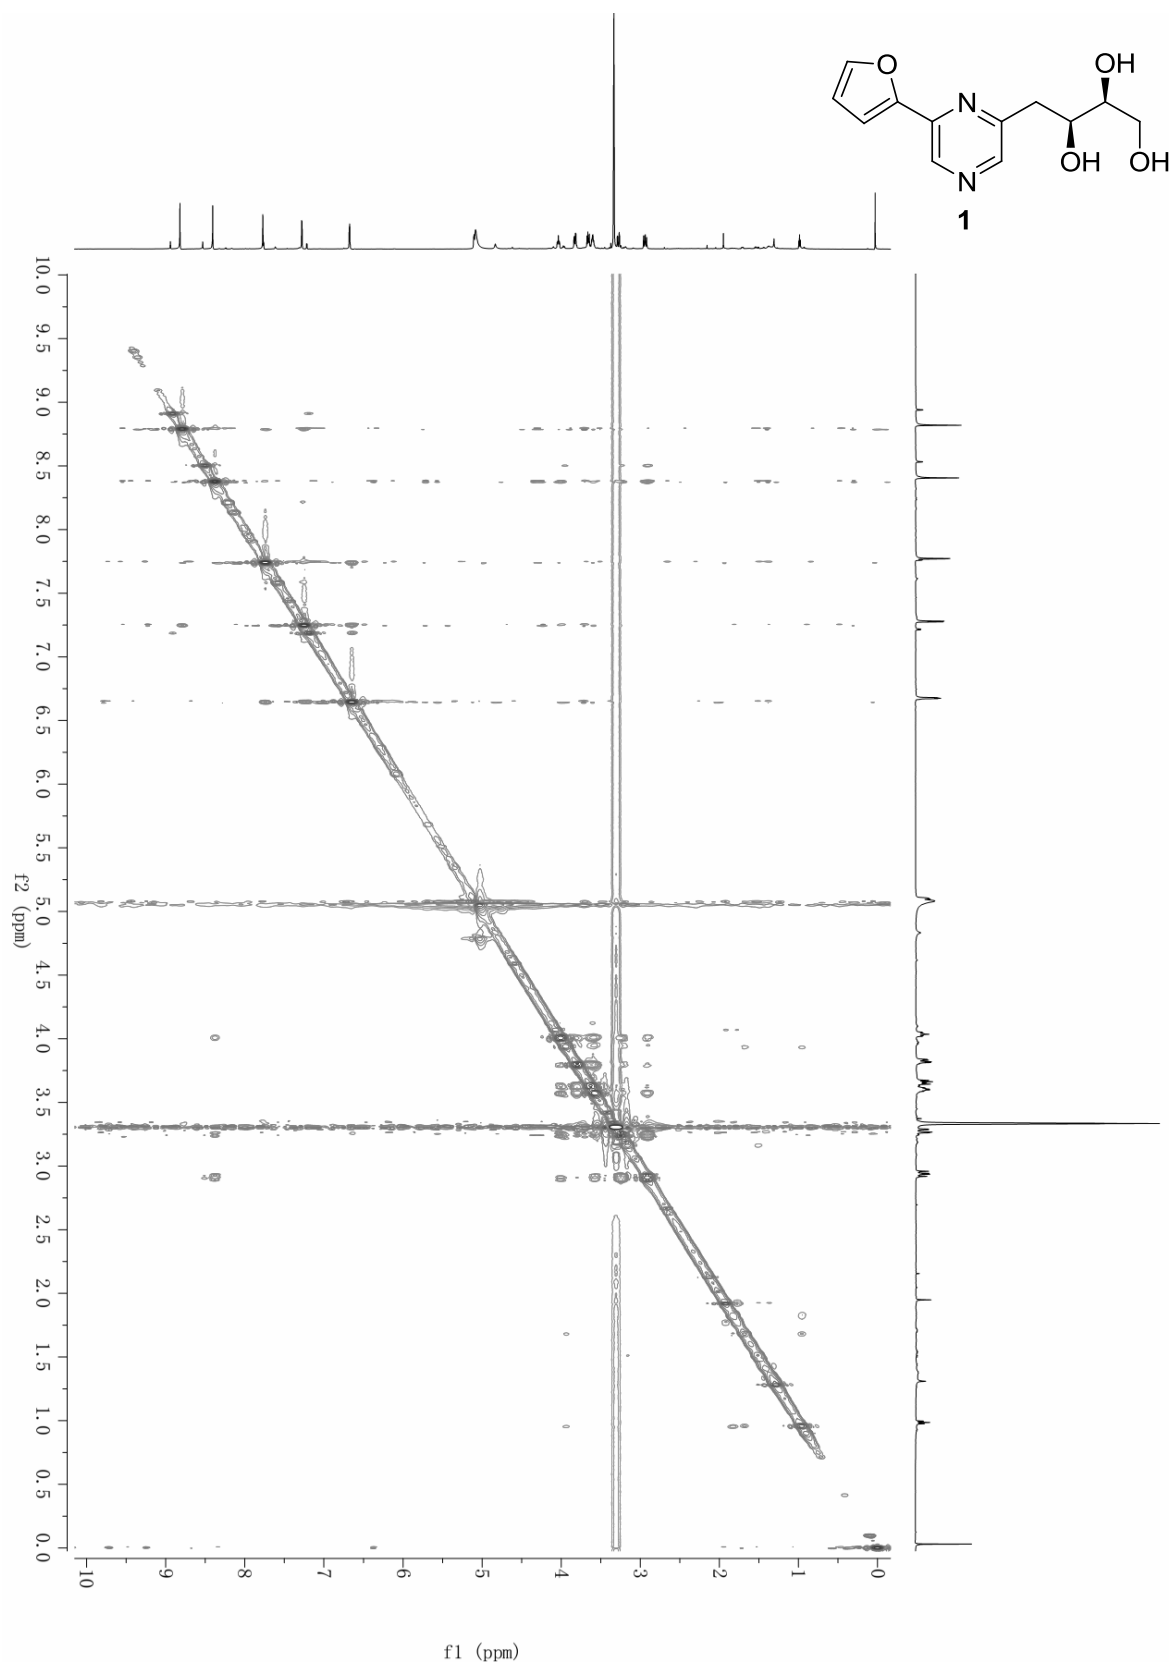

**Figure S9.** The  $^1\text{H}$  NMR (600 MHz,  $\text{MeOH-}d_4$ ) spectrum of compound **2**.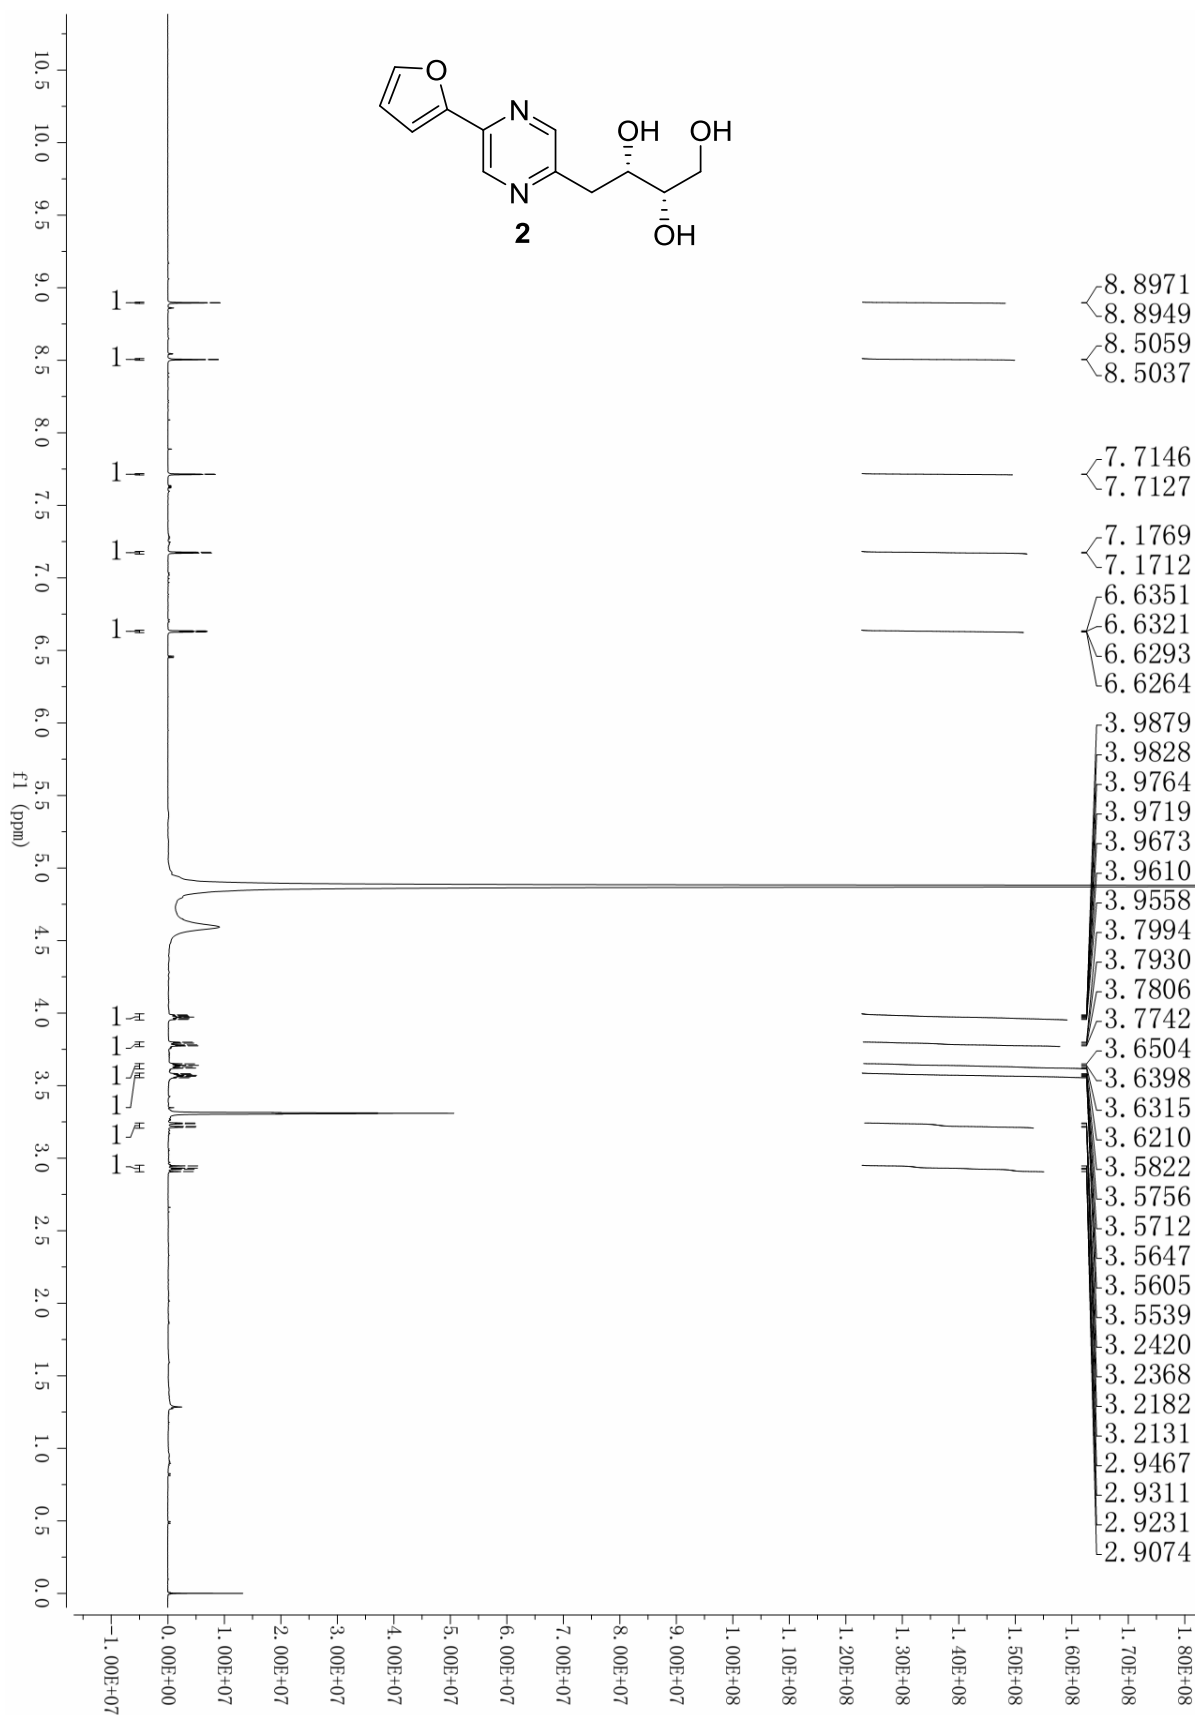

**Figure S10.** The  $^1\text{H}$  NMR (600 MHz,  $\text{MeOH-}d_4$ ) spectrum of compound **2** at  $-4\text{ }^\circ\text{C}$ .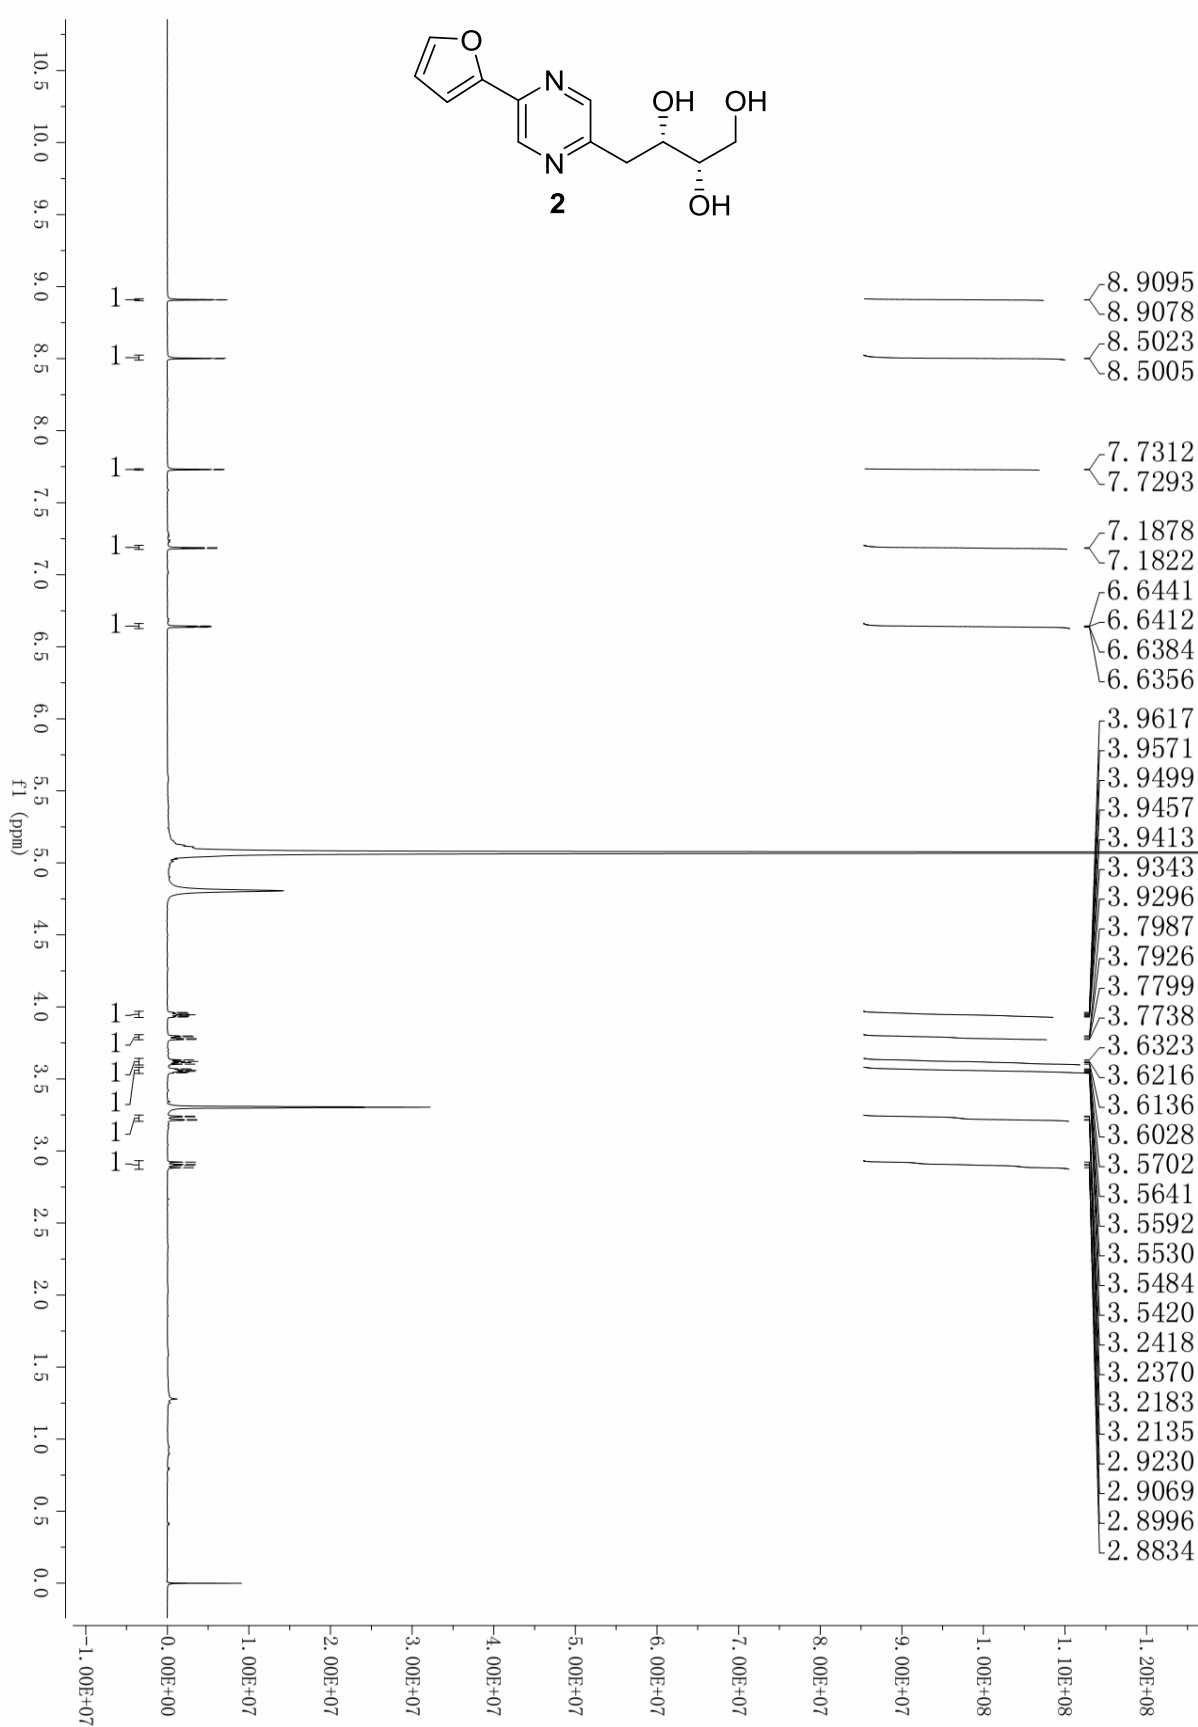

**Figure S11.** The DEPTQ (150 MHz, MeOH-*d*<sub>4</sub>) spectrum of compound **2**.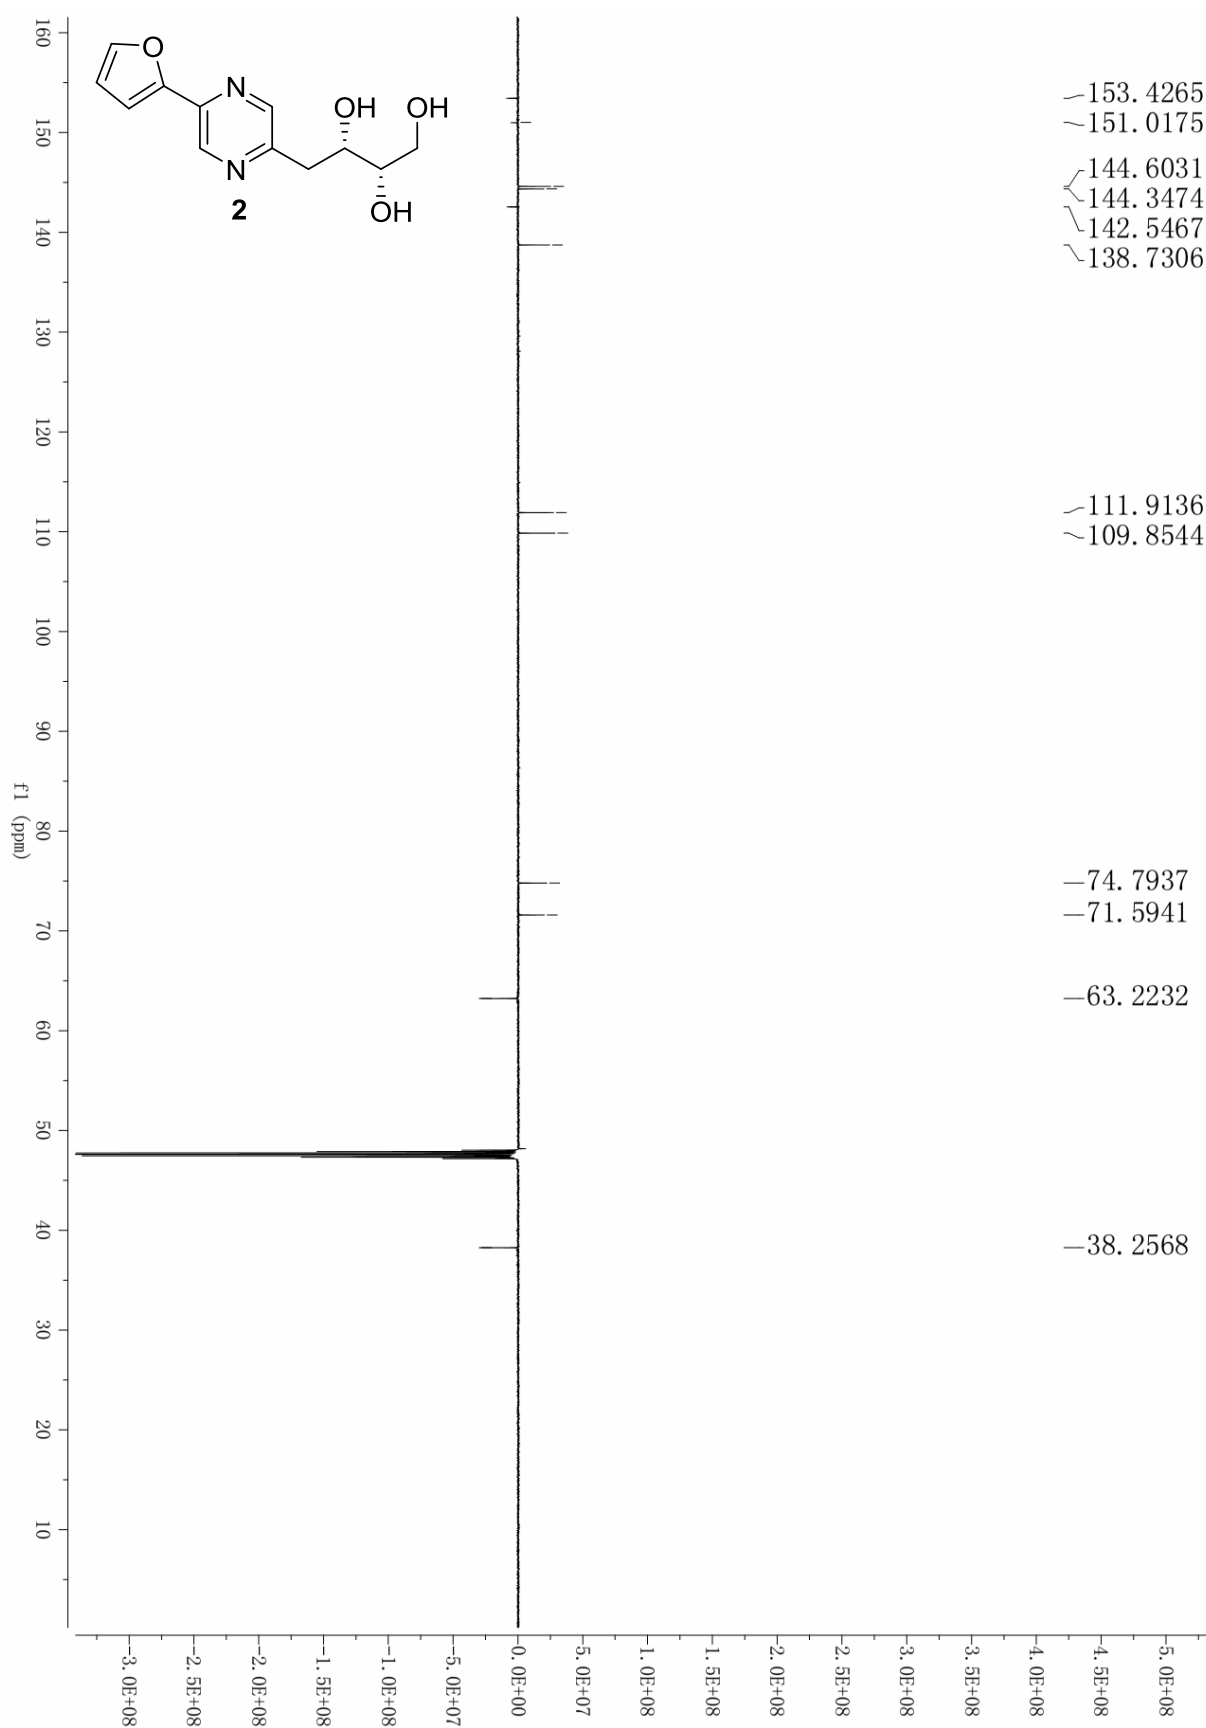

**Figure S12.** The  $^1\text{H}$ - $^1\text{H}$  COSY(600 MHz,  $\text{MeOH-}d_4$ ) spectrum of compound **2**.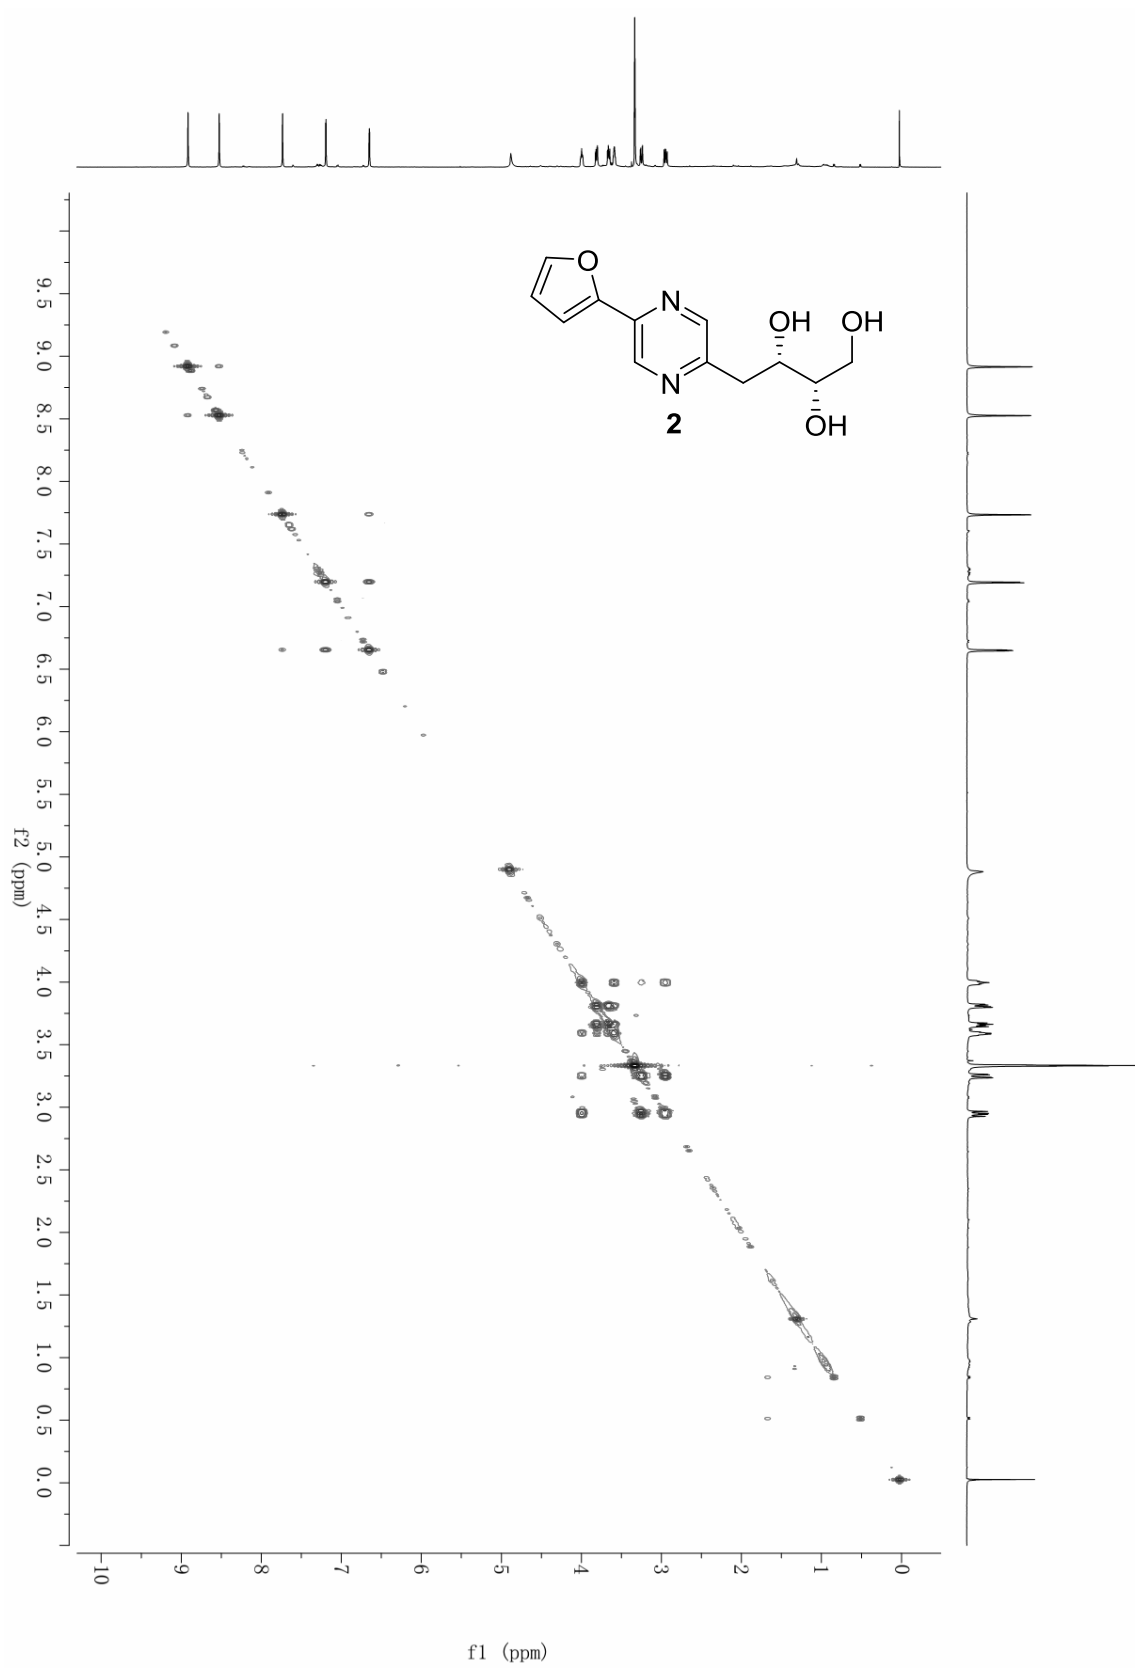

**Figure S13.** The HSQC (150 MHz, MeOH- $d_4$ ) spectrum of compound **2**.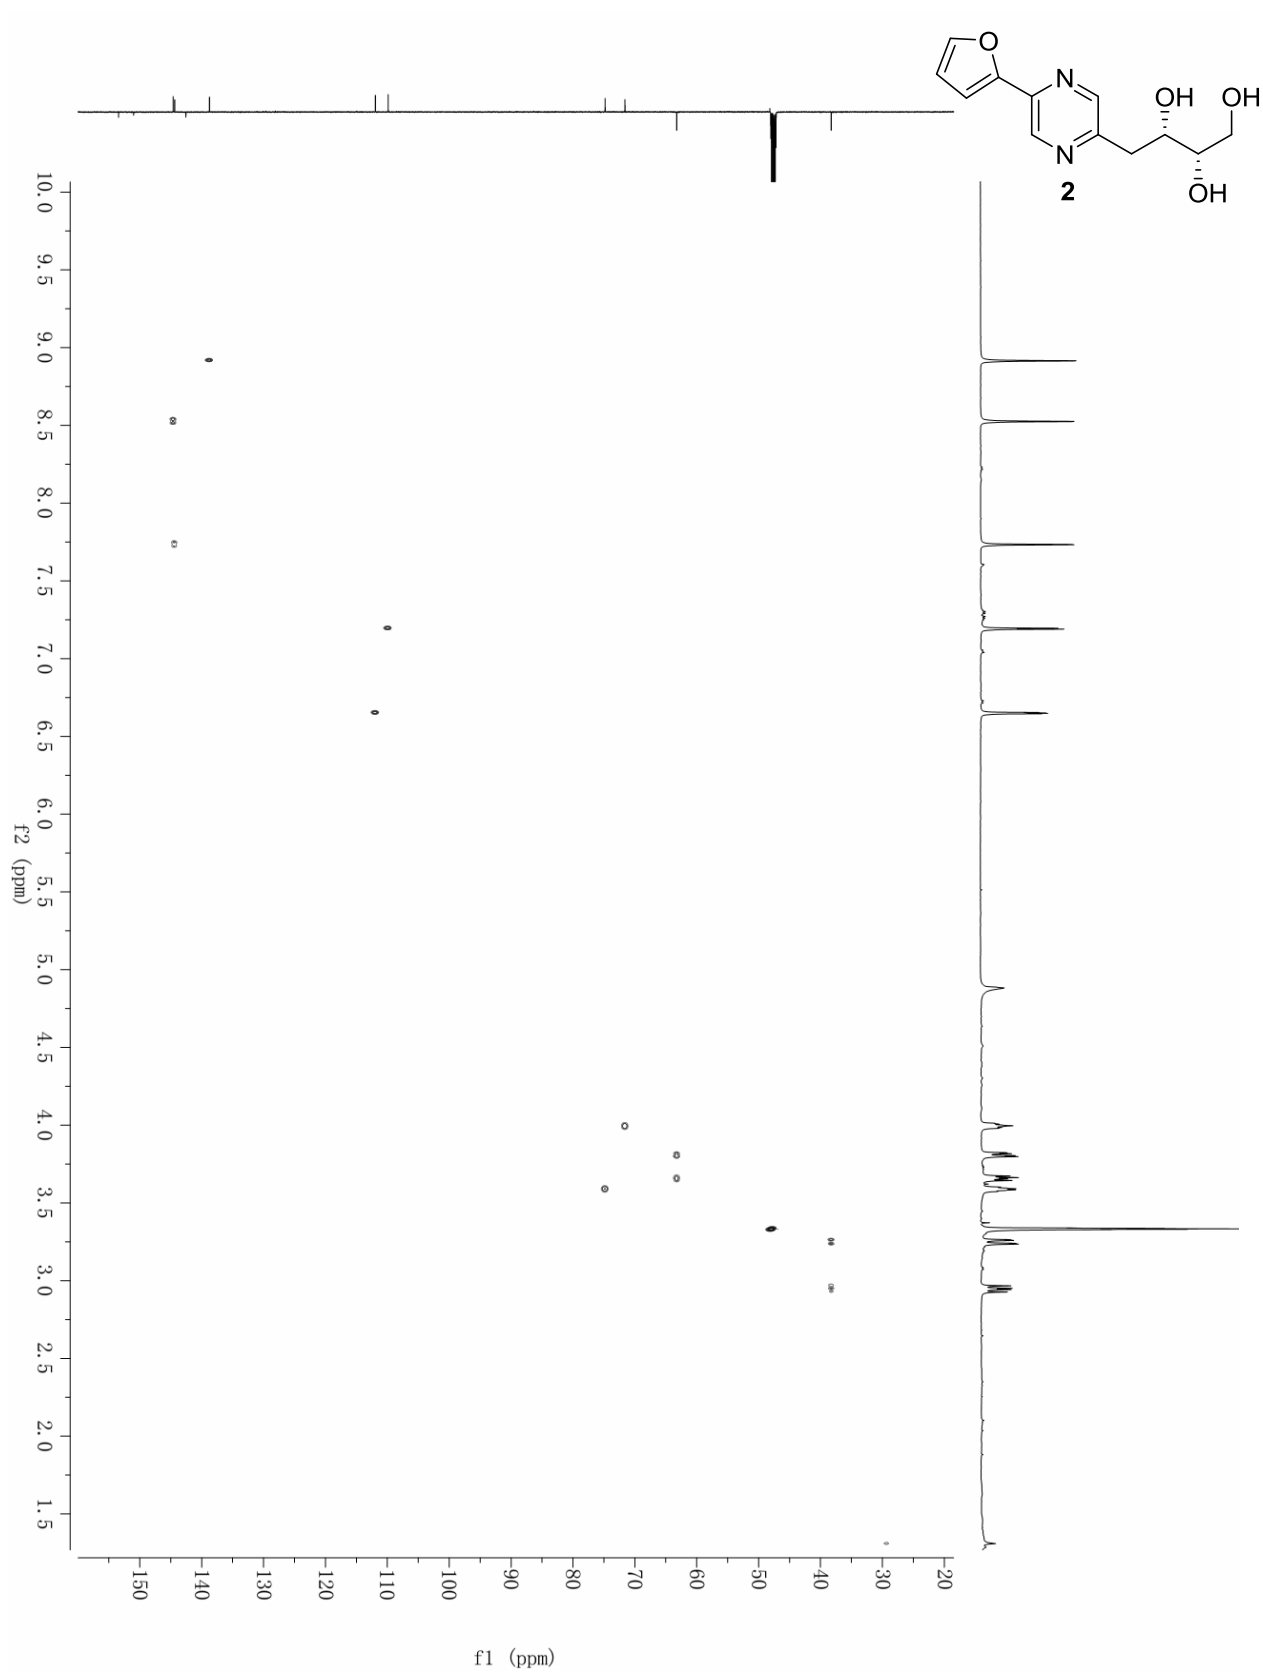

**Figure S14.** The HMBC (150 MHz, MeOH-*d*<sub>4</sub>) spectrum of compound **2**.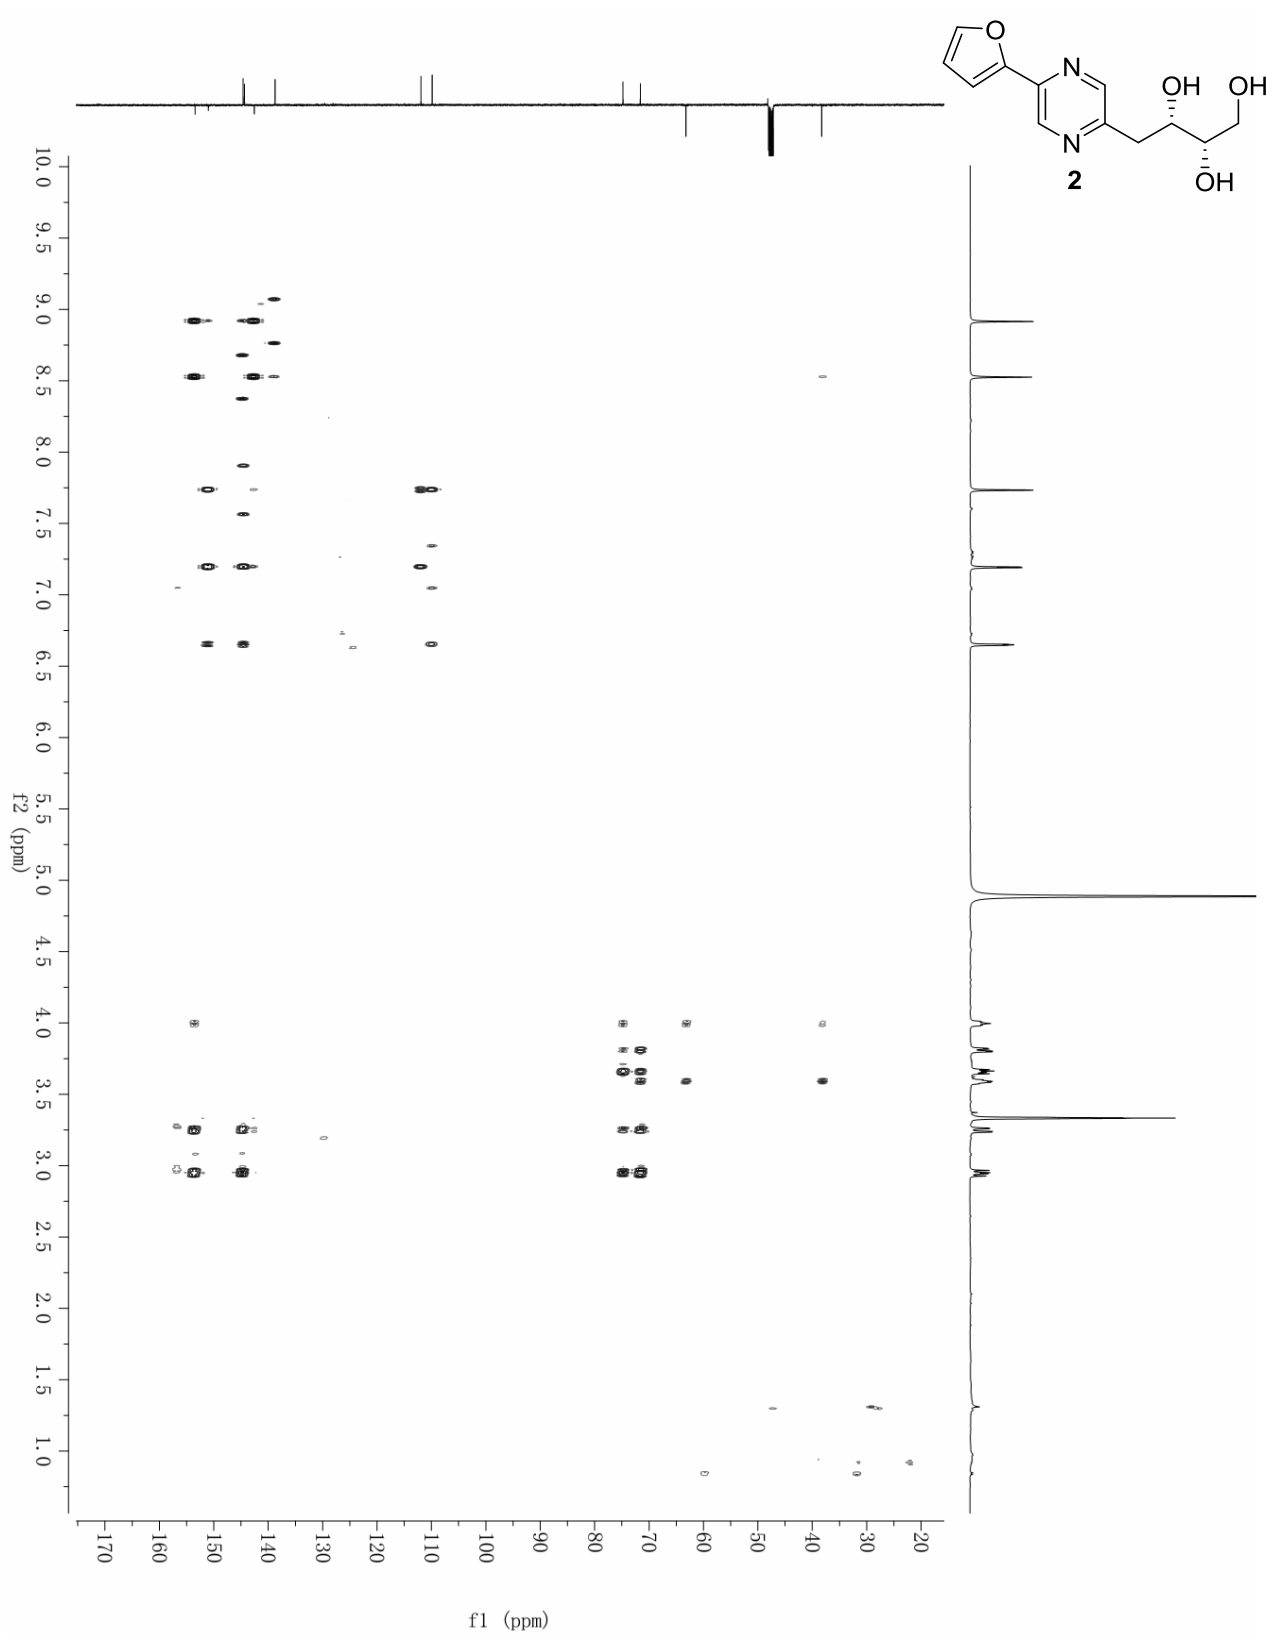



**Figure S15.** The NOESY (600 MHz, MeOH- $d_4$ ) spectrum of compound 2.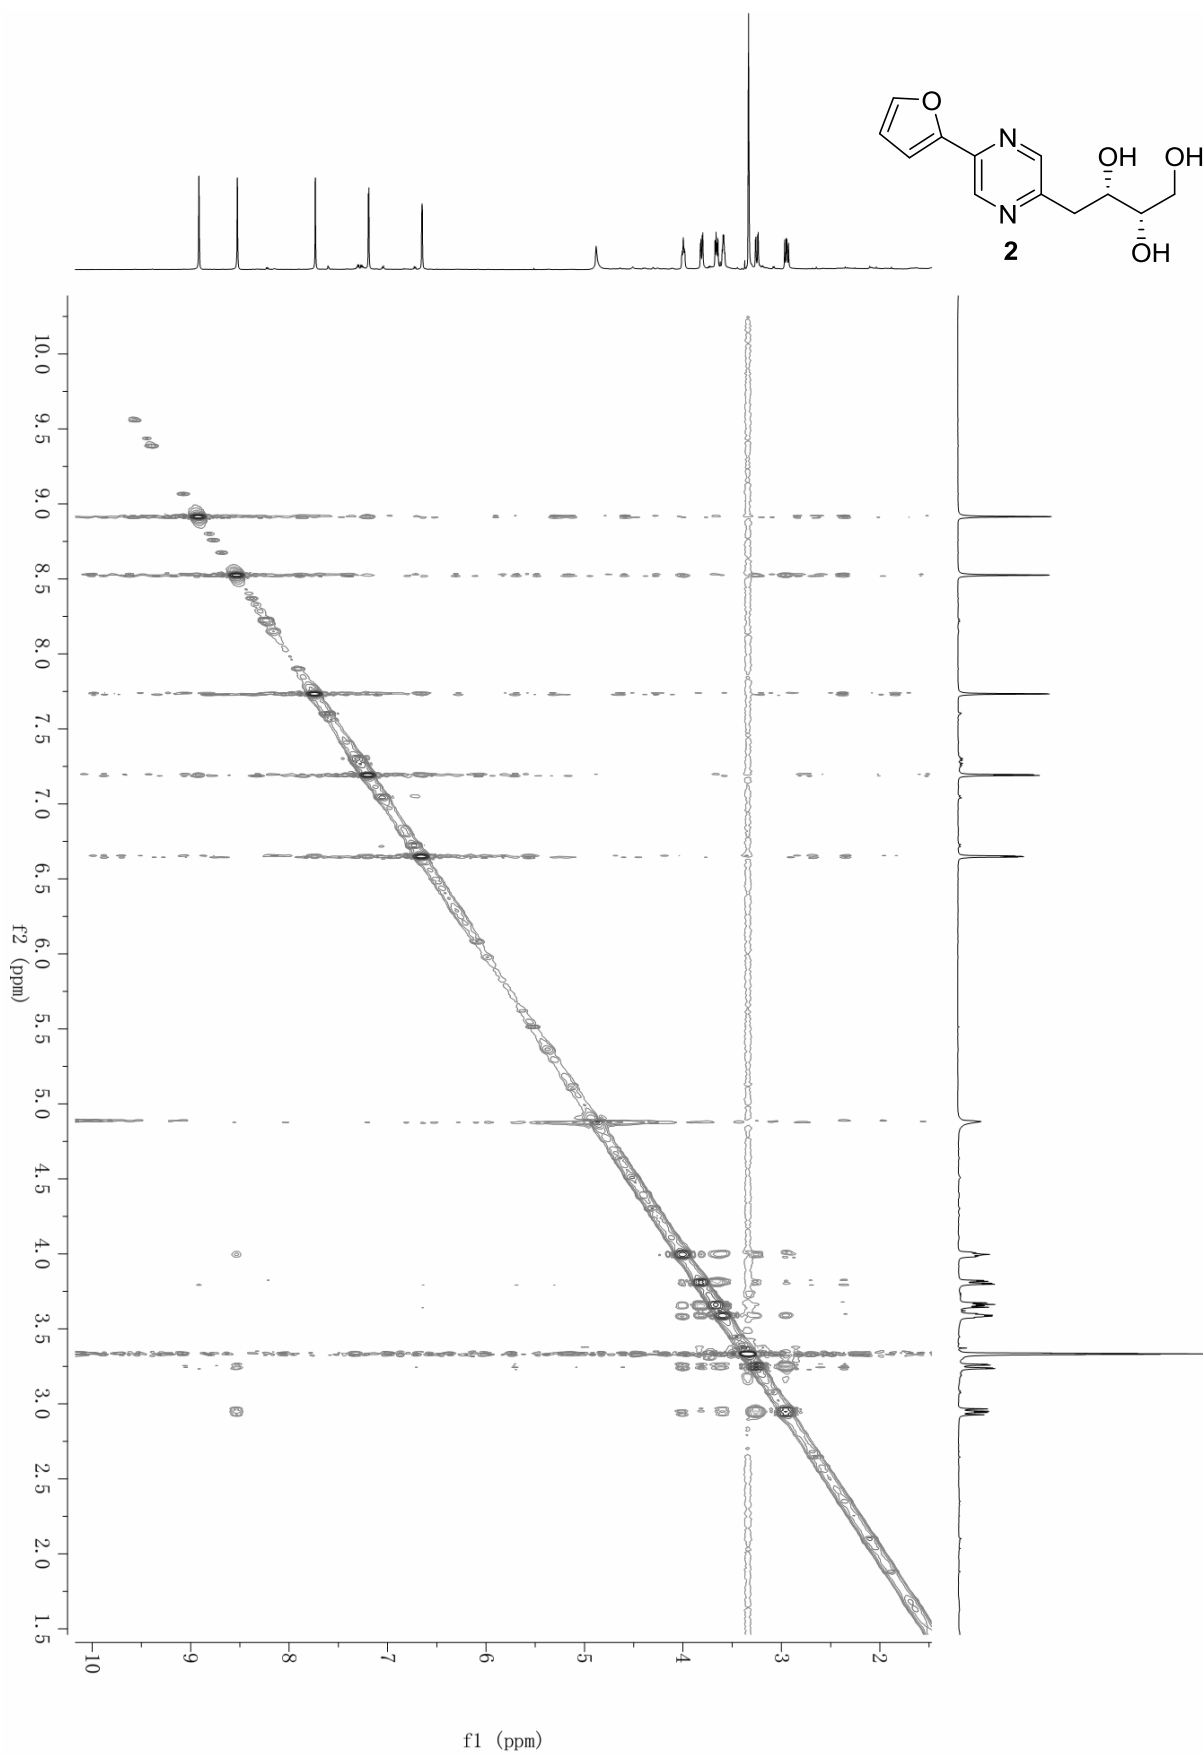

**Figure S16.** The NOESY (600 MHz, MeOH- $d_4$ ) spectrum of compound **2** at  $-4\text{ }^\circ\text{C}$ .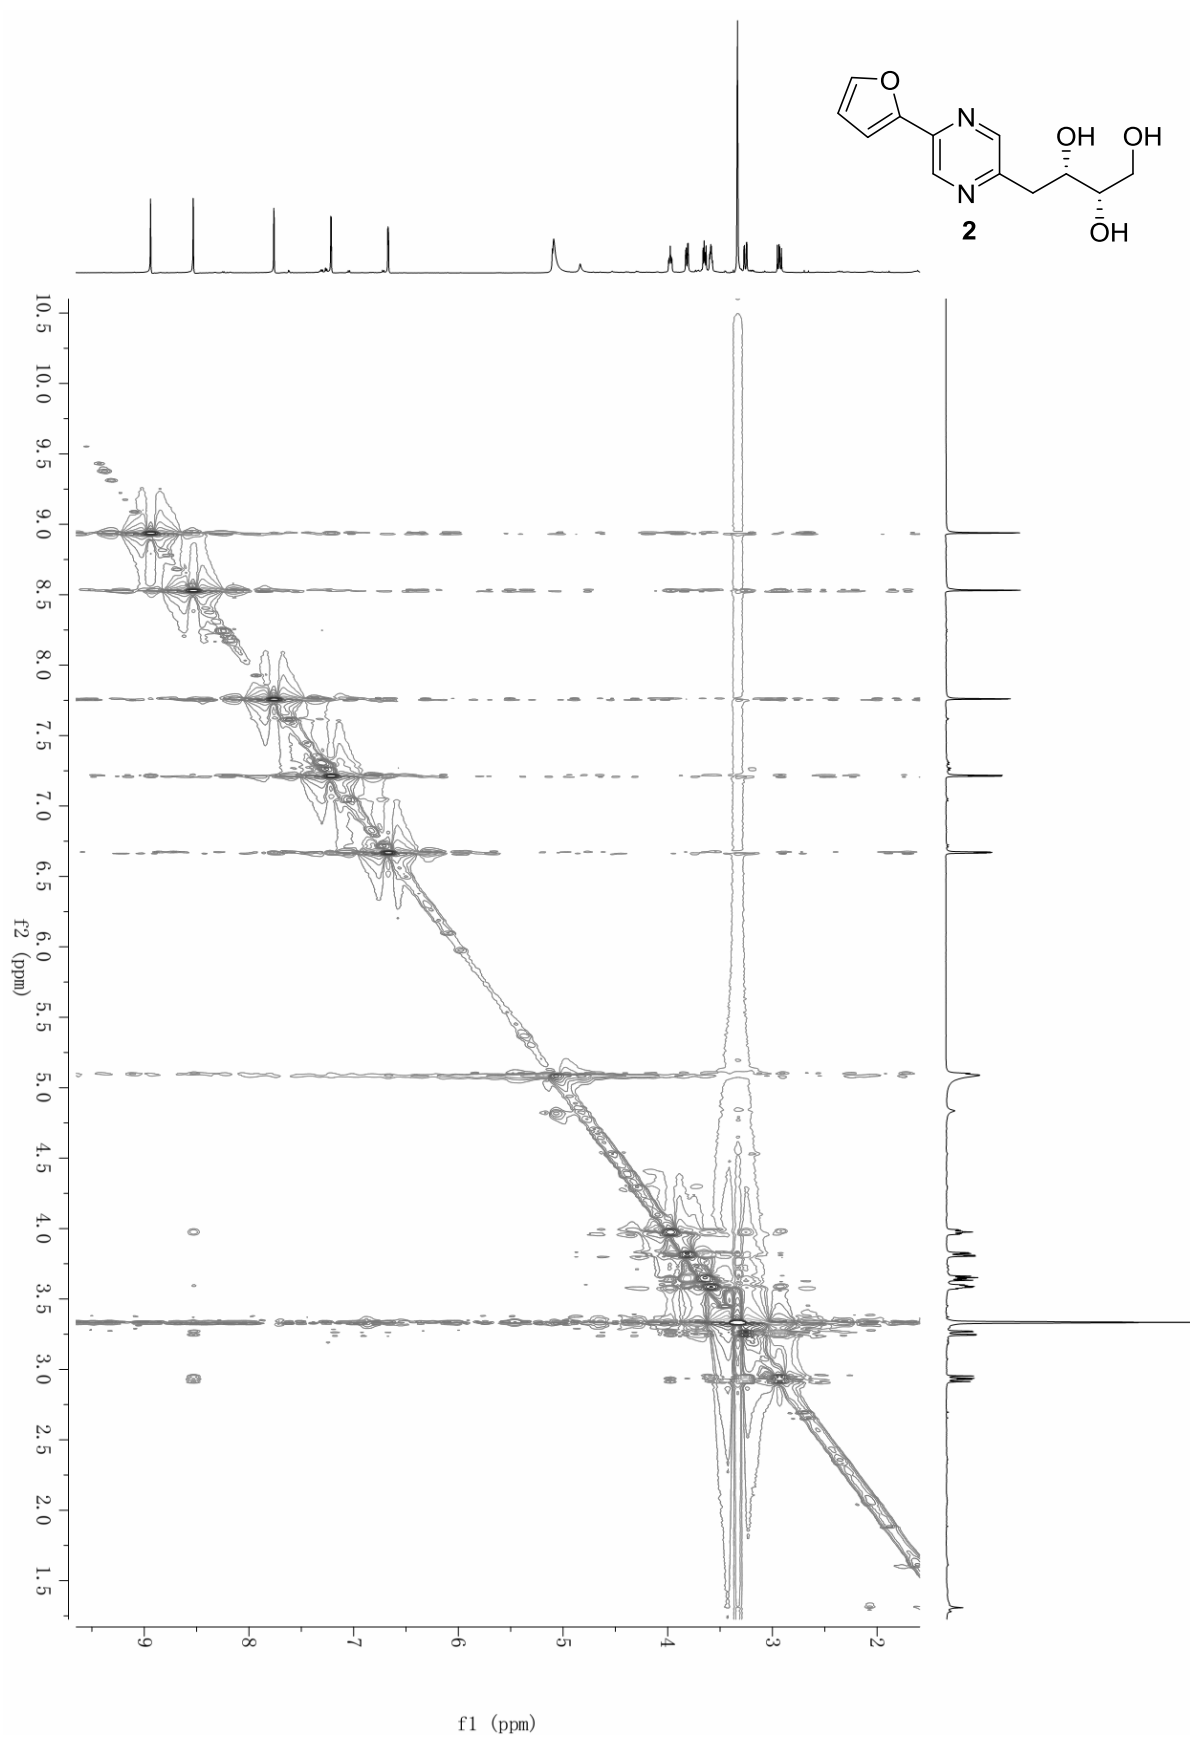

**Figure S17.** The  $^1\text{H}$  NMR (600 MHz,  $\text{DMSO-}d_6$ ) spectrum of compound **3**.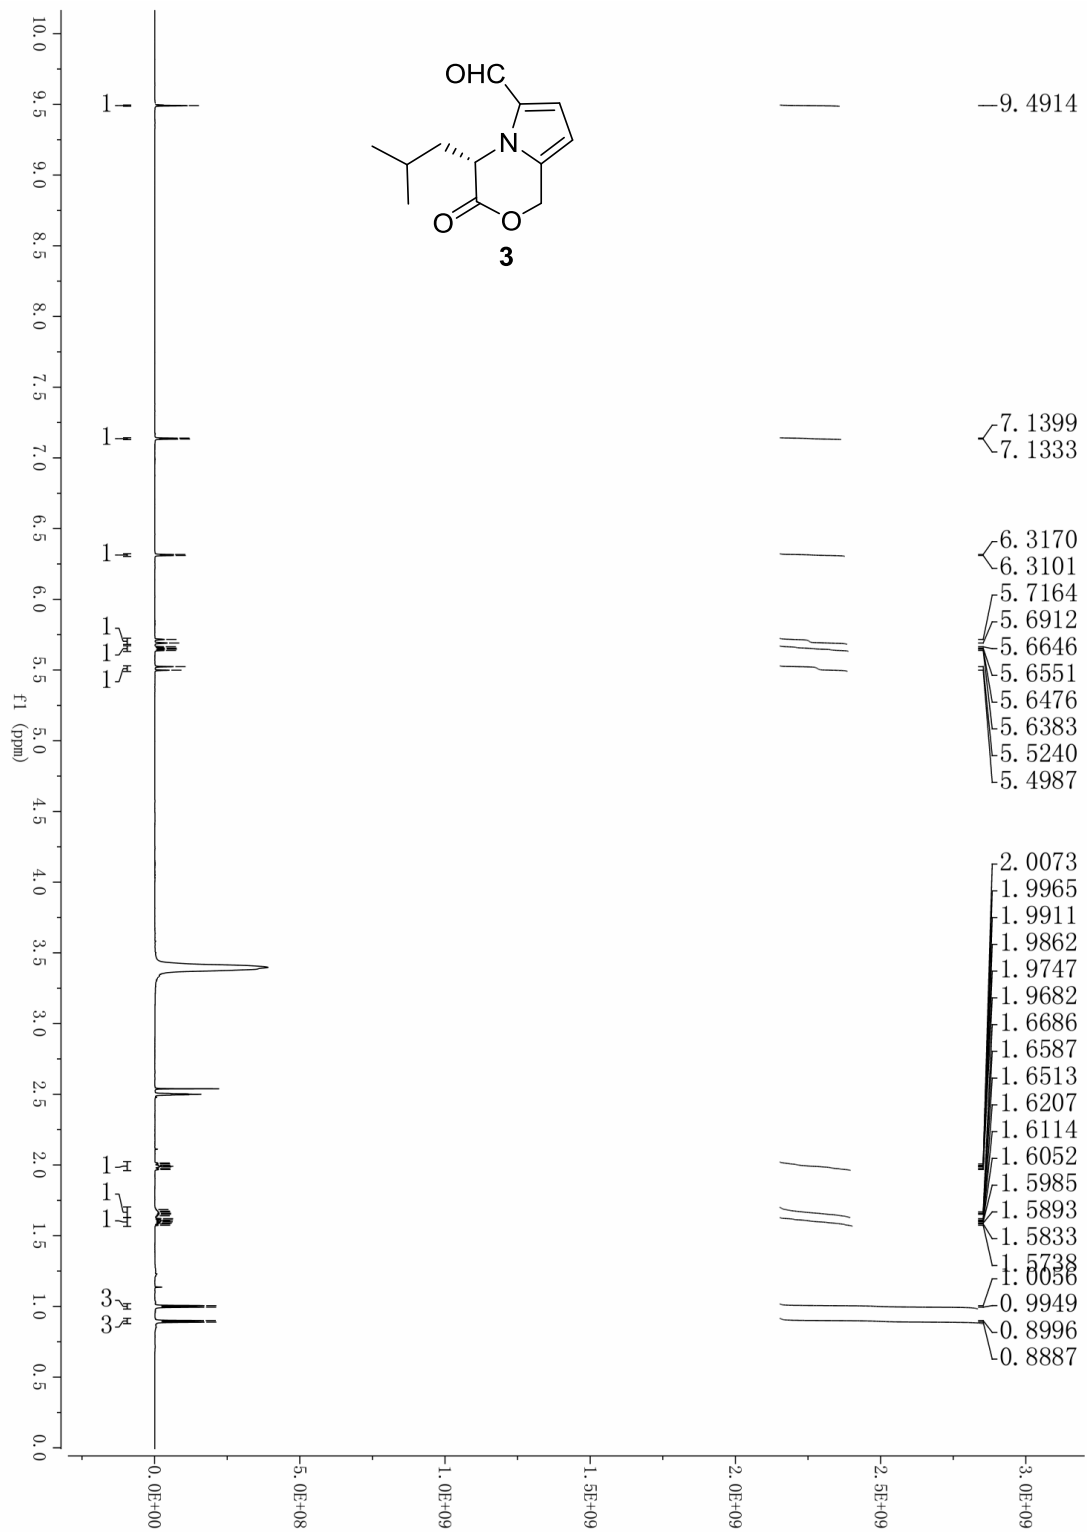

**Figure S18.** The  $^{13}\text{C}$  NMR (150 MHz,  $\text{DMSO-}d_6$ ) spectrum of compound **3**.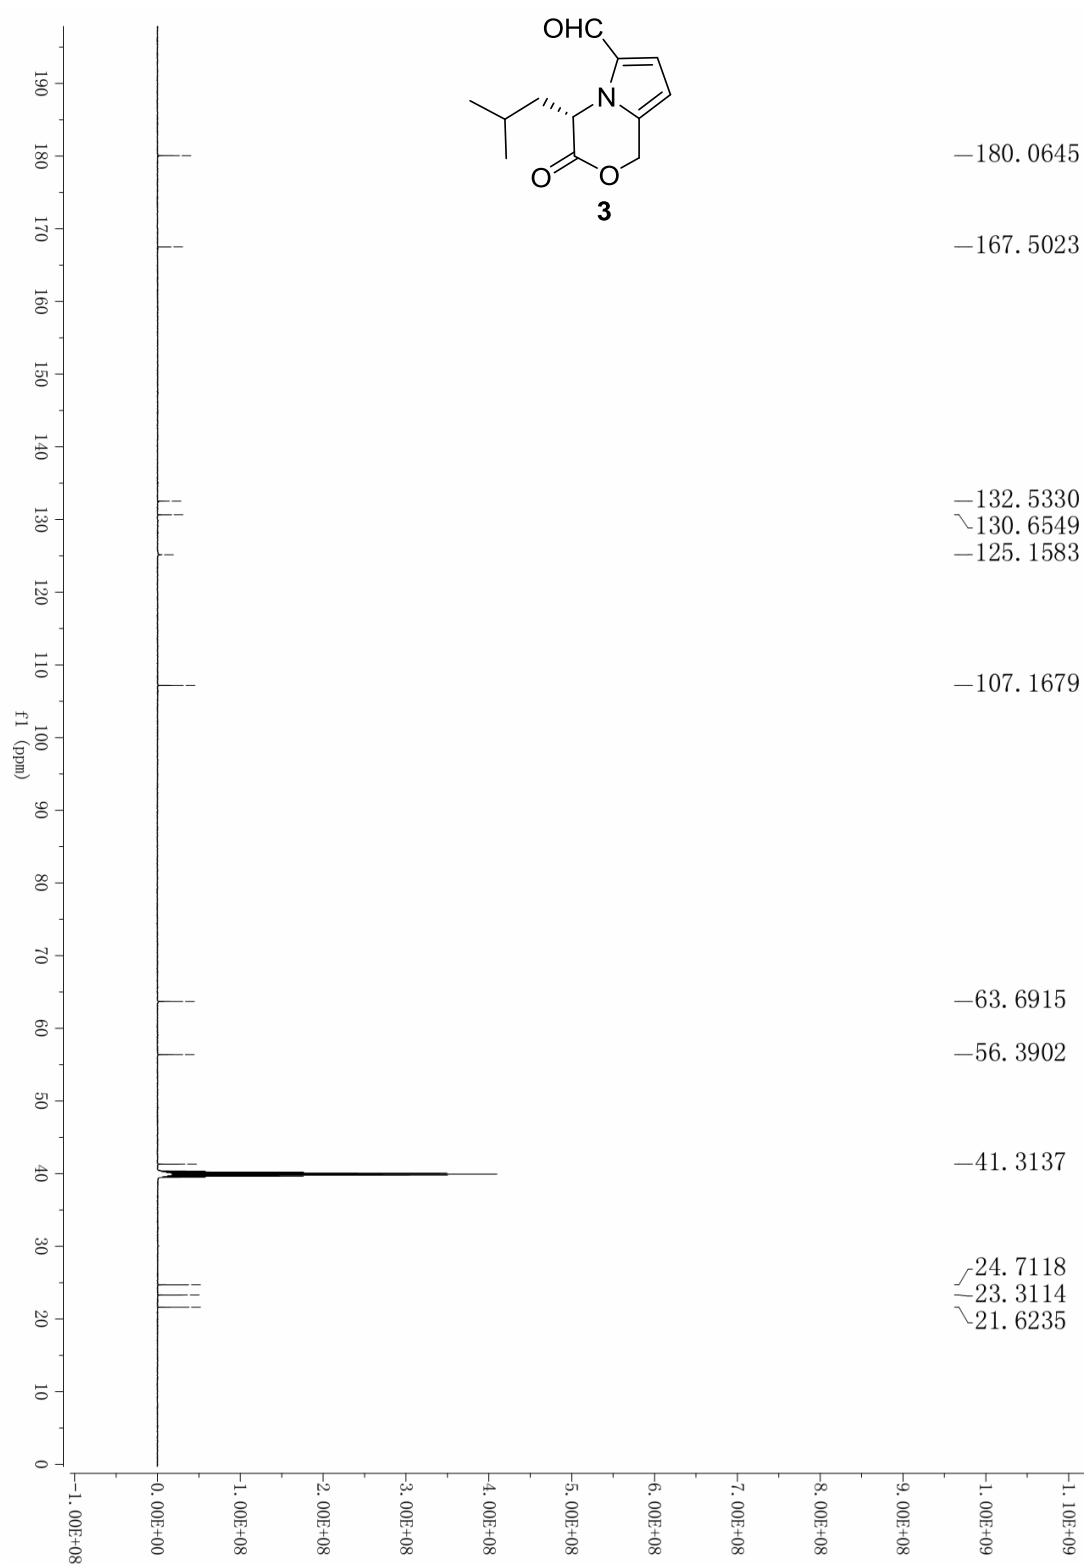

**Figure S19.** The DEPT (150 MHz, DMSO- $d_6$ ) spectrum of compound **3**.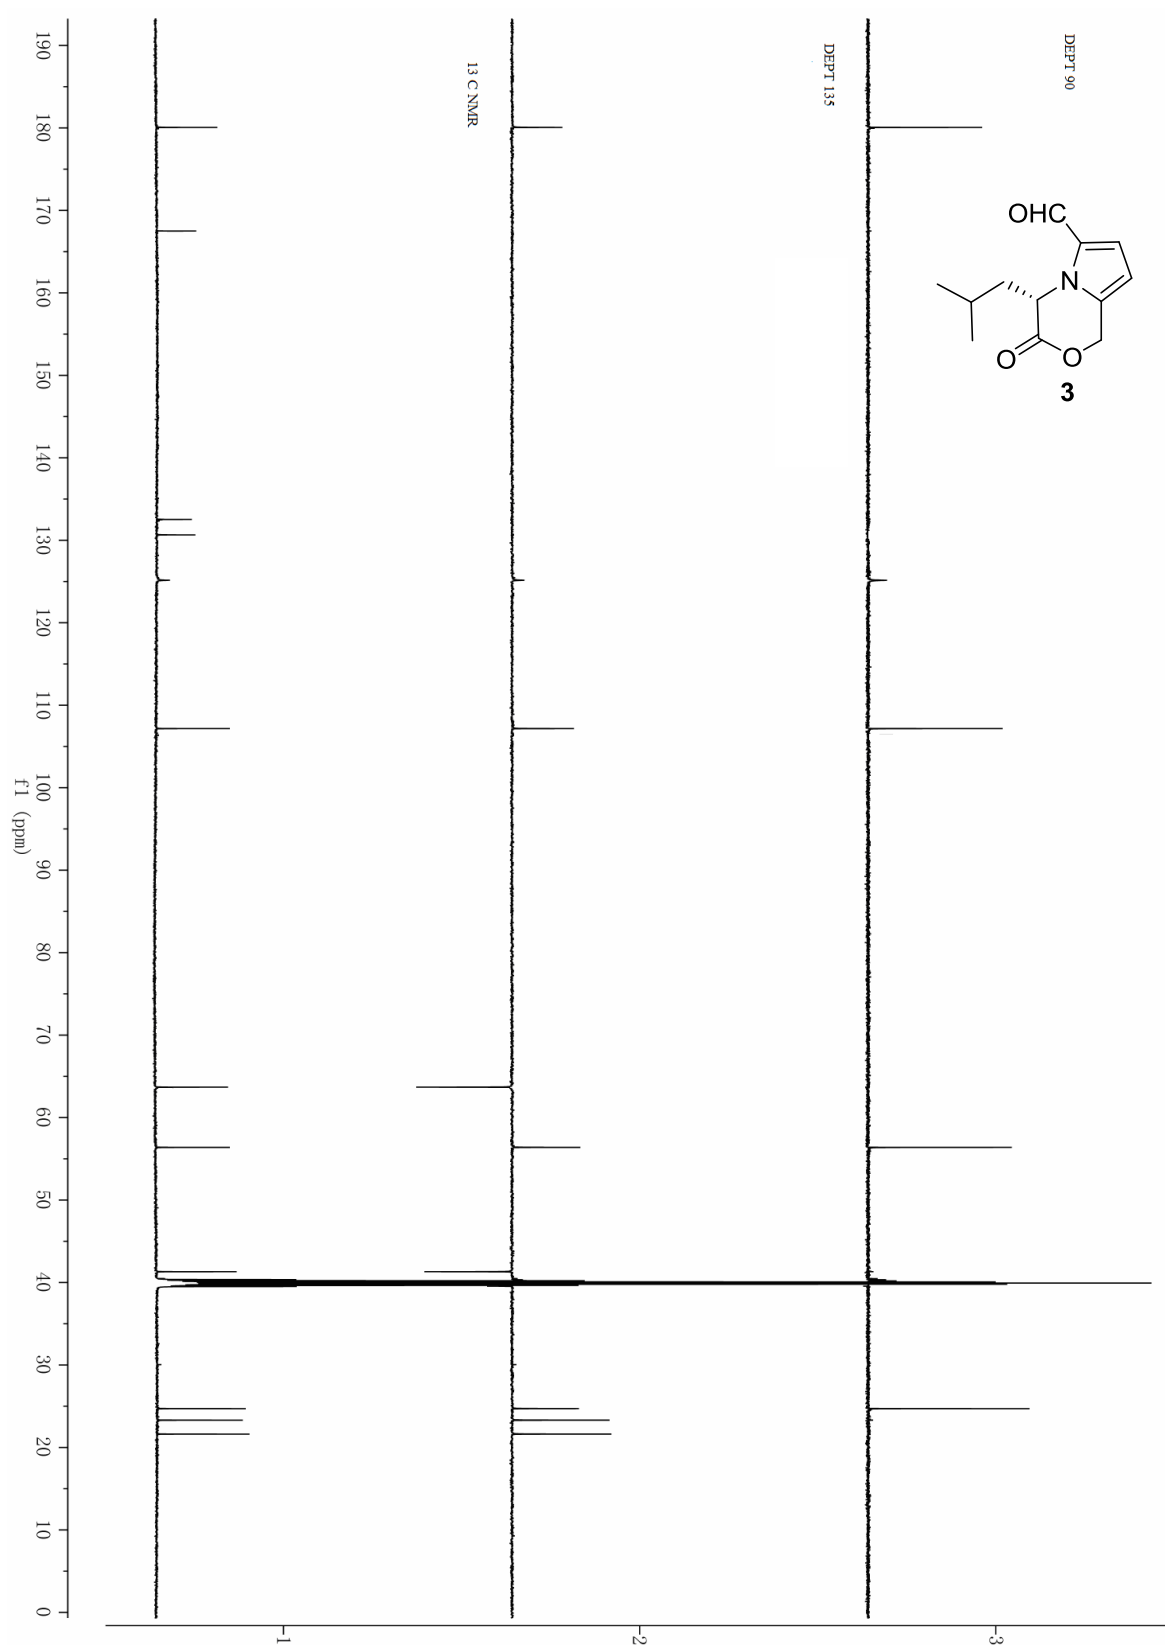

**Figure S20.** The  $^1\text{H}$ - $^1\text{H}$  COSY (600 MHz,  $\text{DMSO-}d_6$ ) spectrum of compound **3**.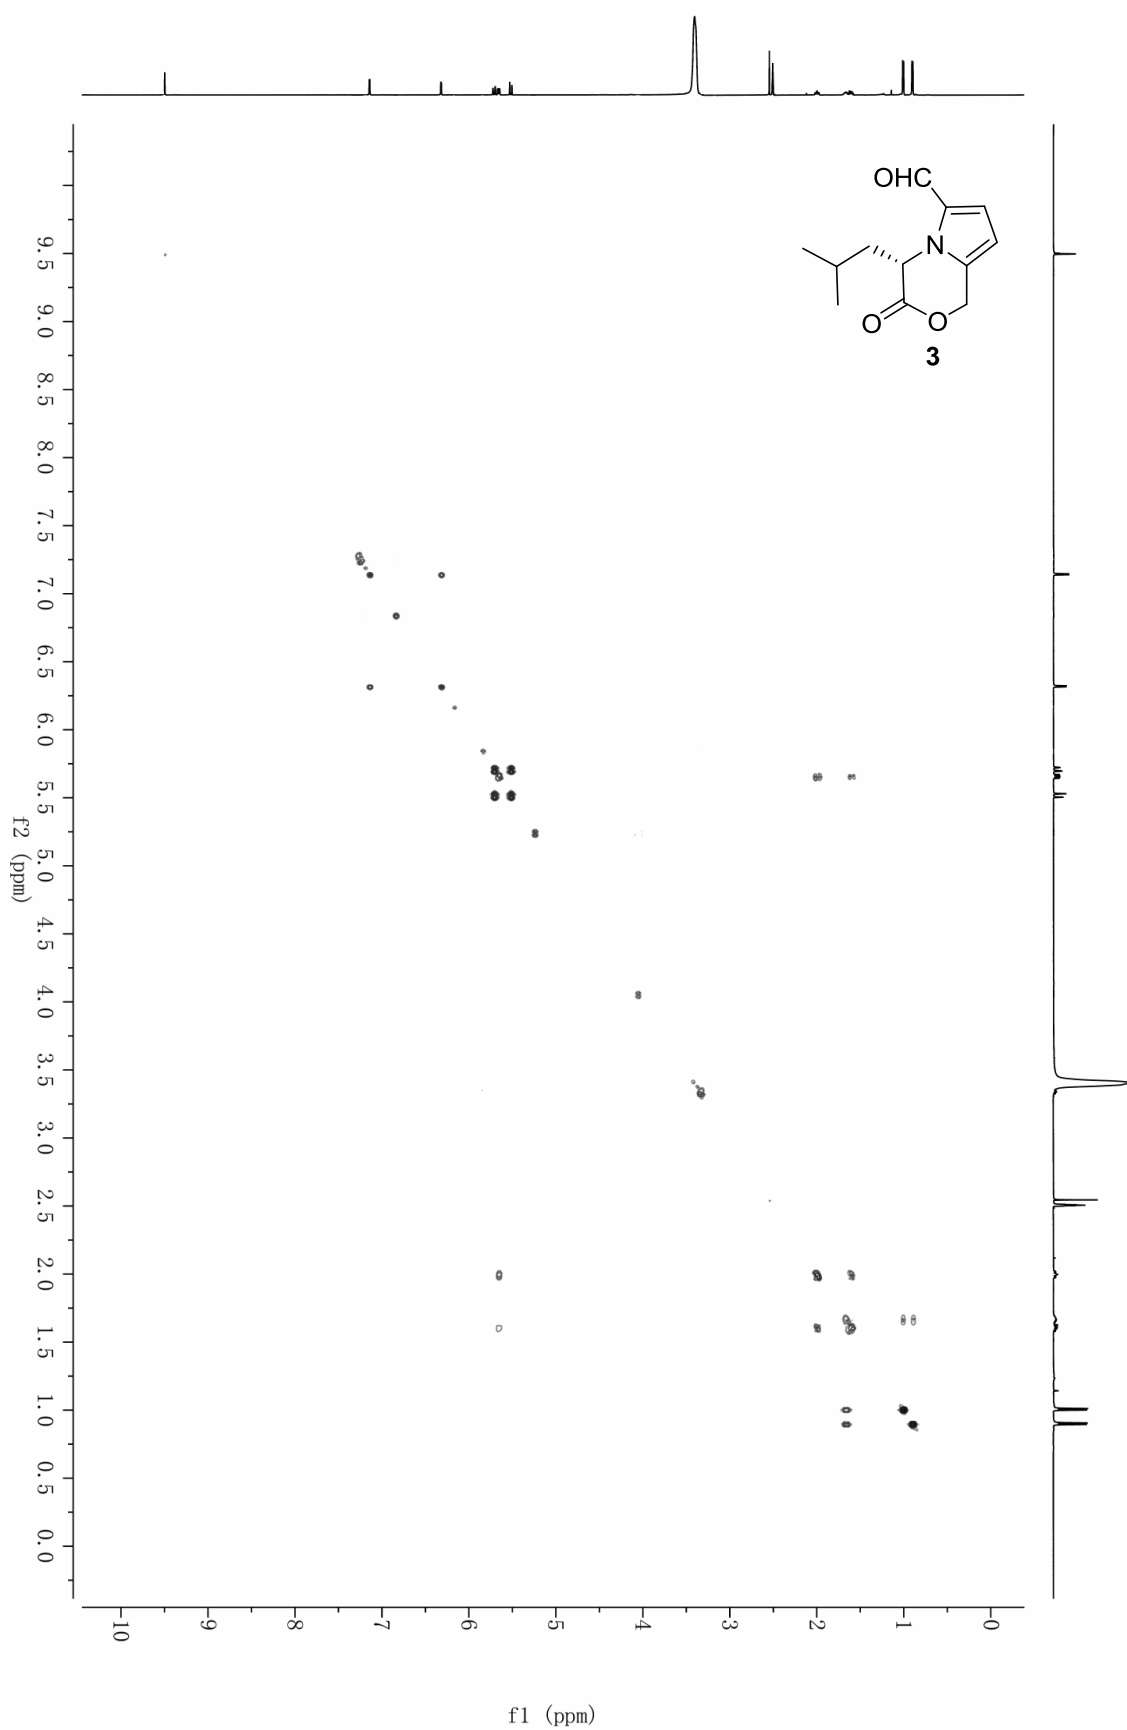

**Figure S21.** The HSQC (150 MHz, DMSO- $d_6$ ) spectrum of compound **3**.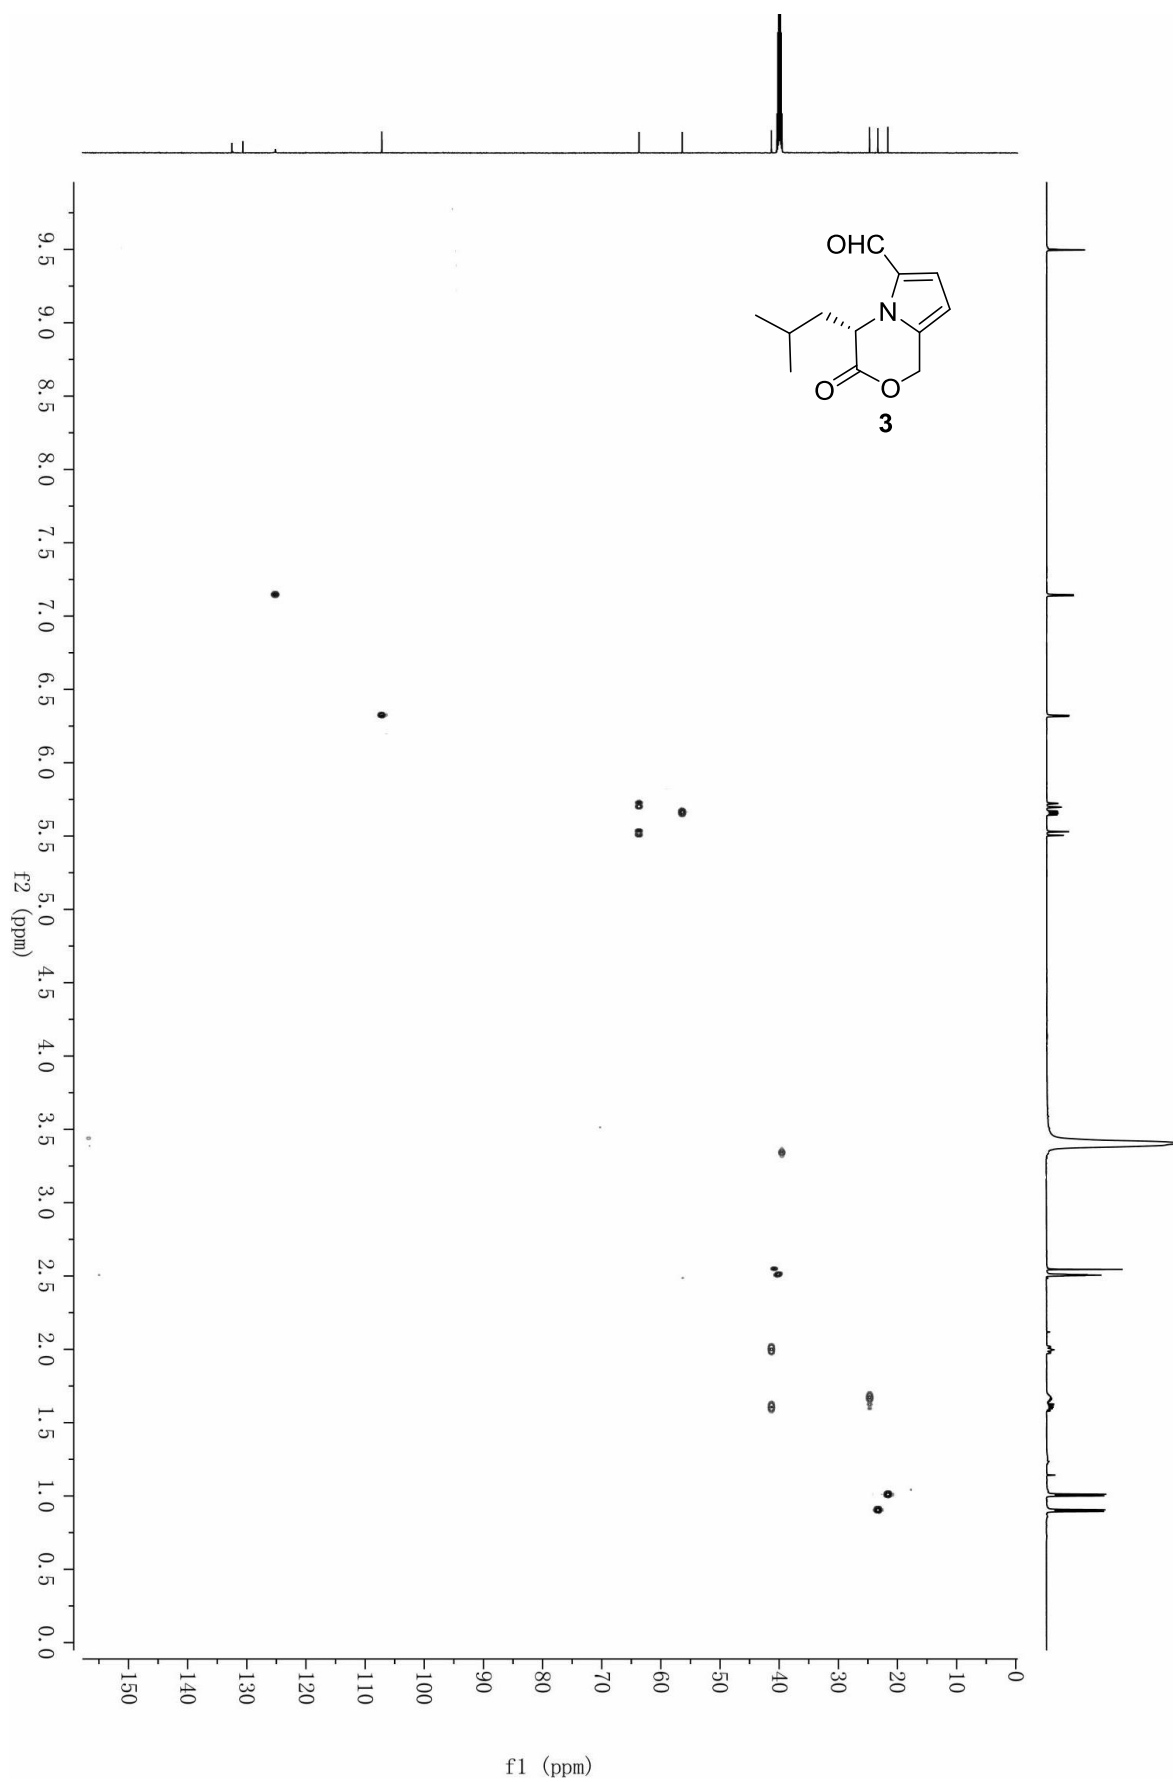

**Figure S22.** The HMBC (150 MHz, DMSO- $d_6$ ) spectrum of compound **3**.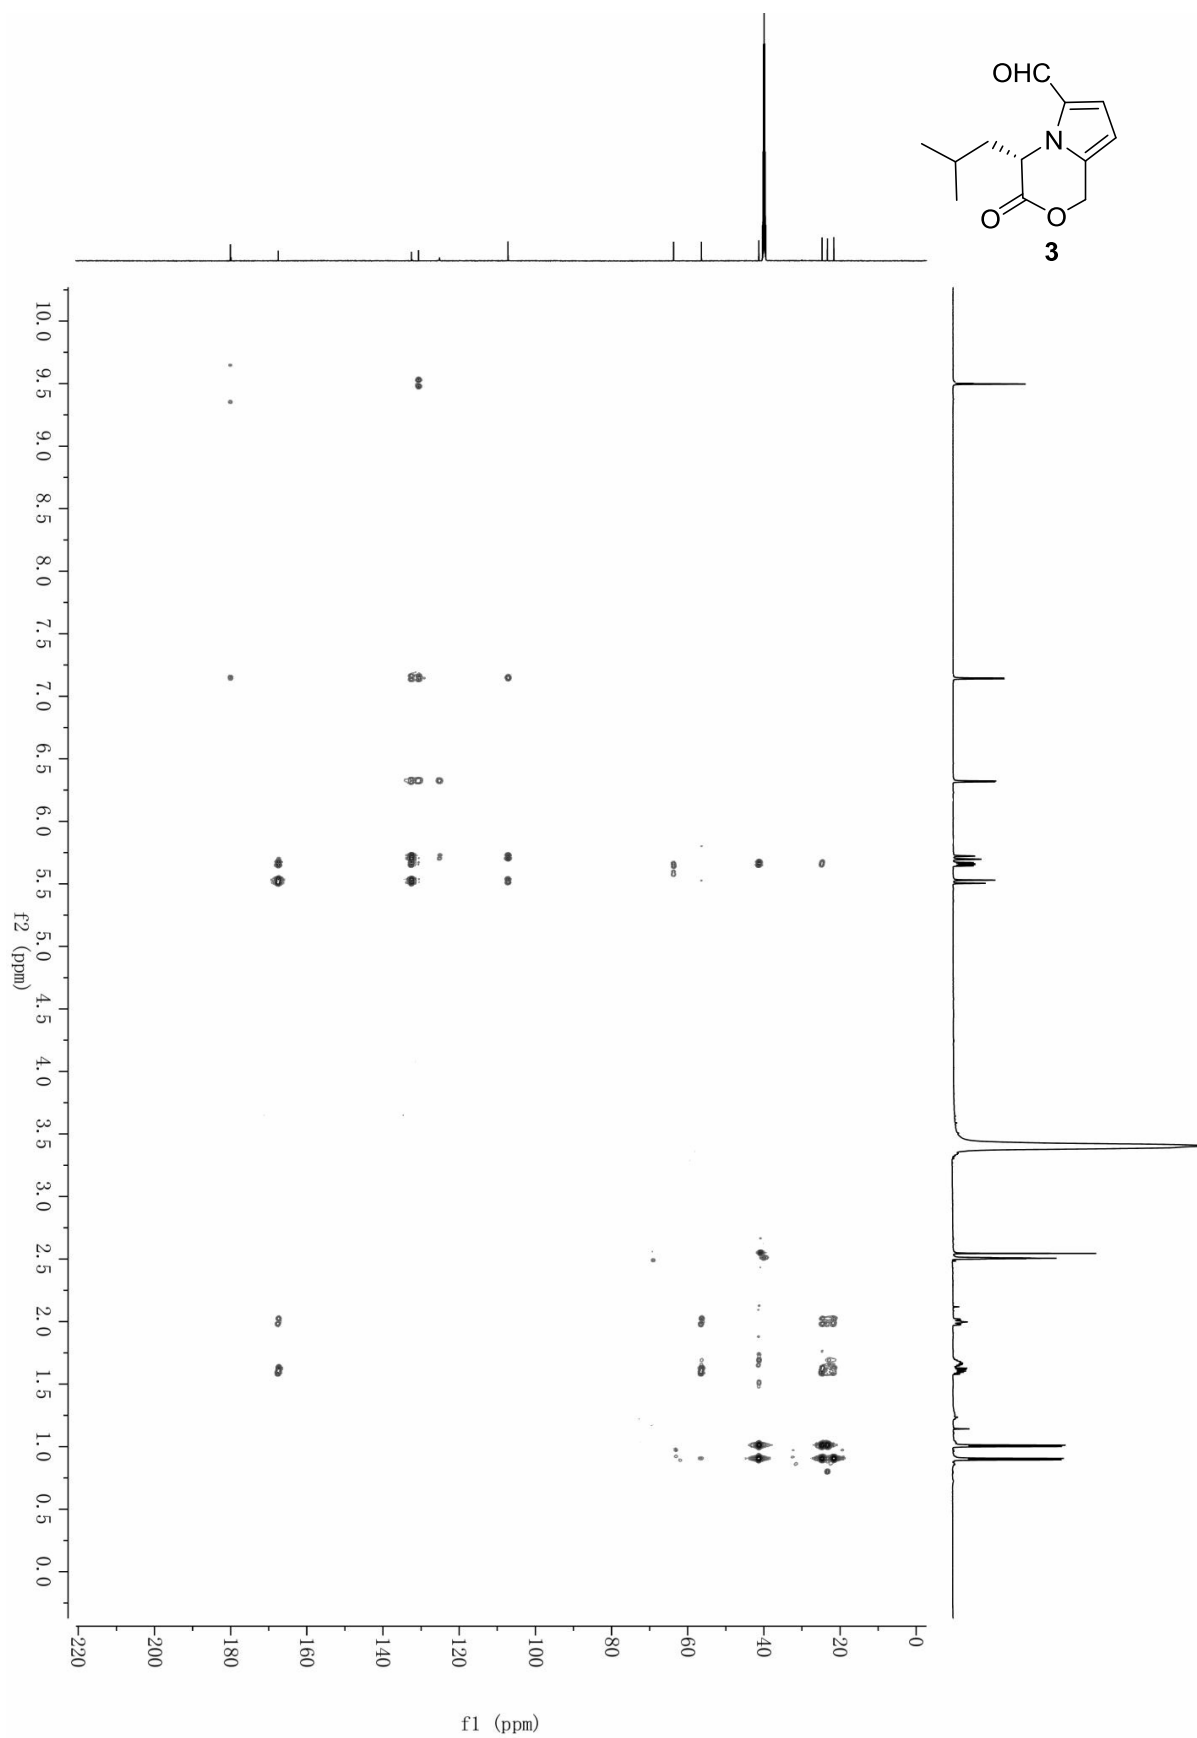



Figure S23. The  $^1\text{H}$  NMR (600 MHz,  $\text{DMSO-}d_6$ ) spectrum of compound 4.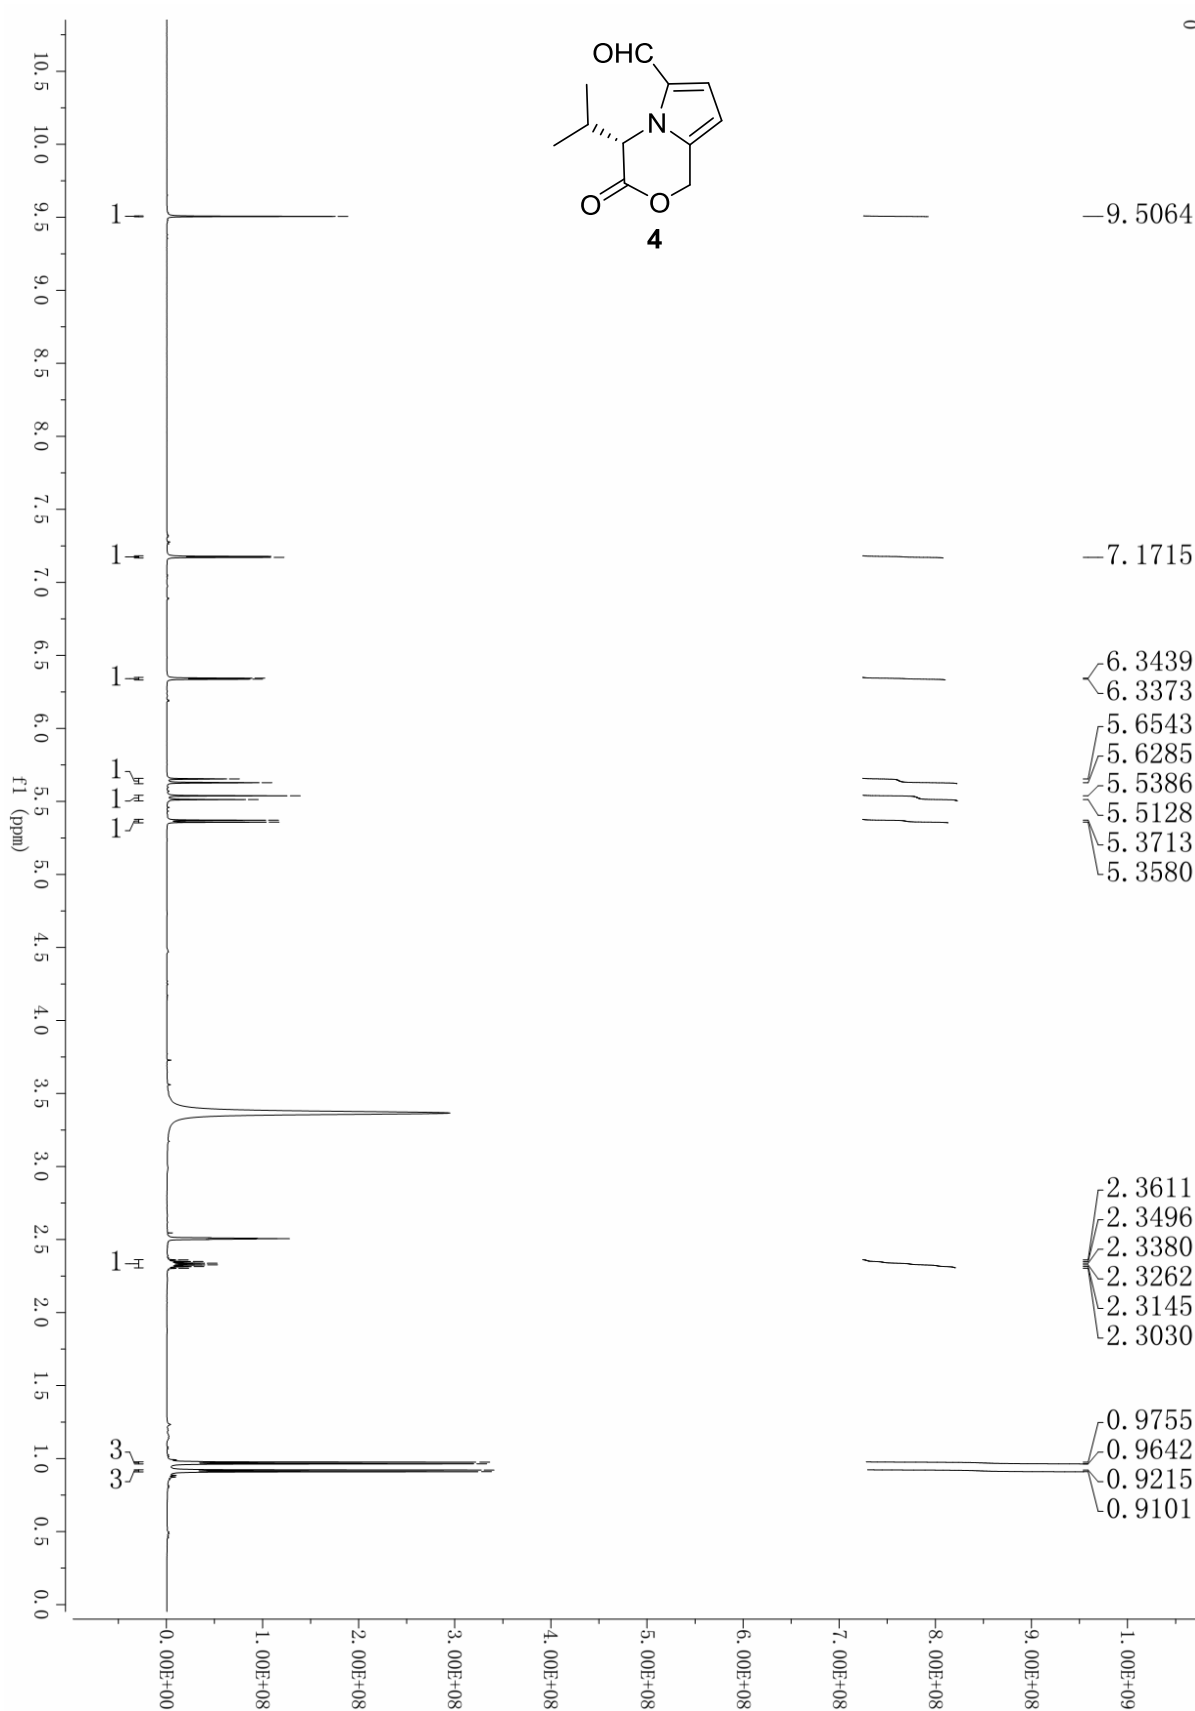

**Figure S24.** The  $^{13}\text{C}$  NMR (150 MHz,  $\text{DMSO-}d_6$ ) spectrum of compound **4**.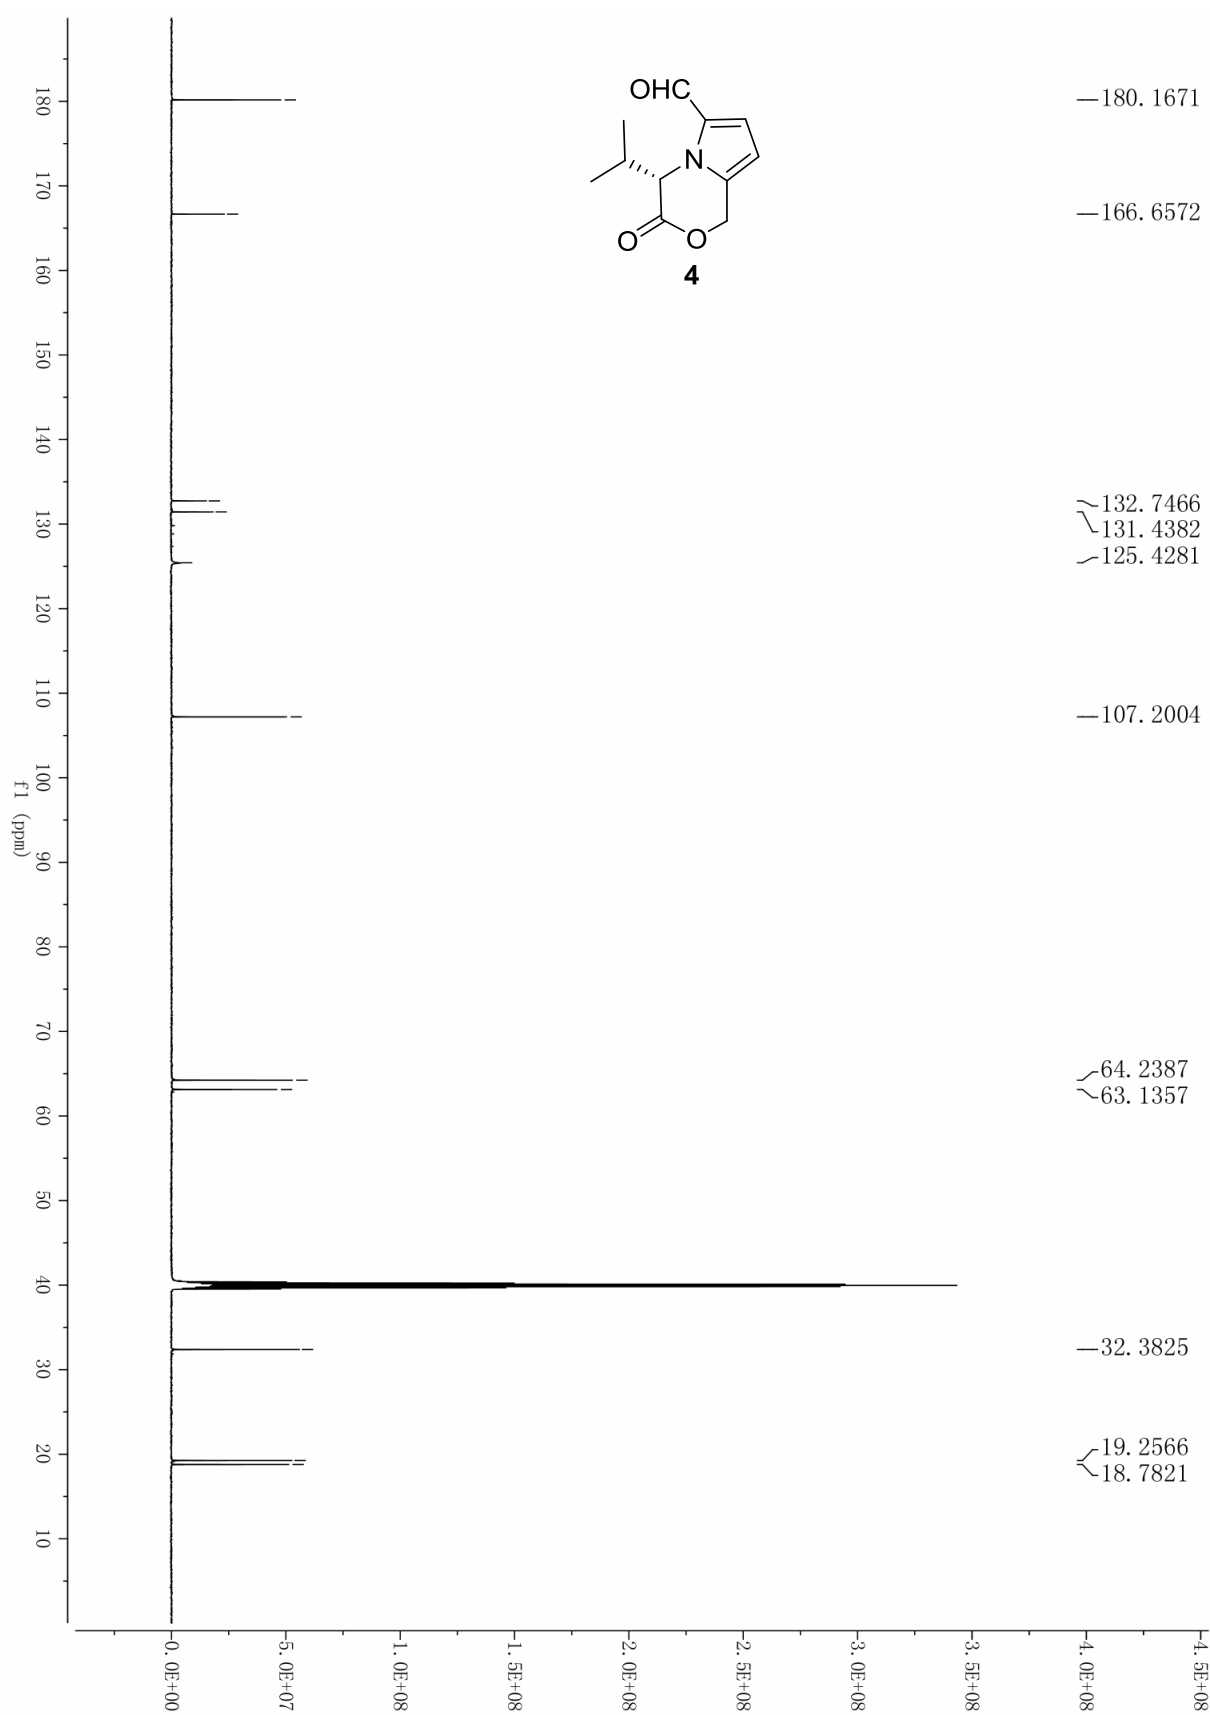

**Figure S25.** The DEPT (150 MHz, DMSO- $d_6$ ) spectrum of compound **4**.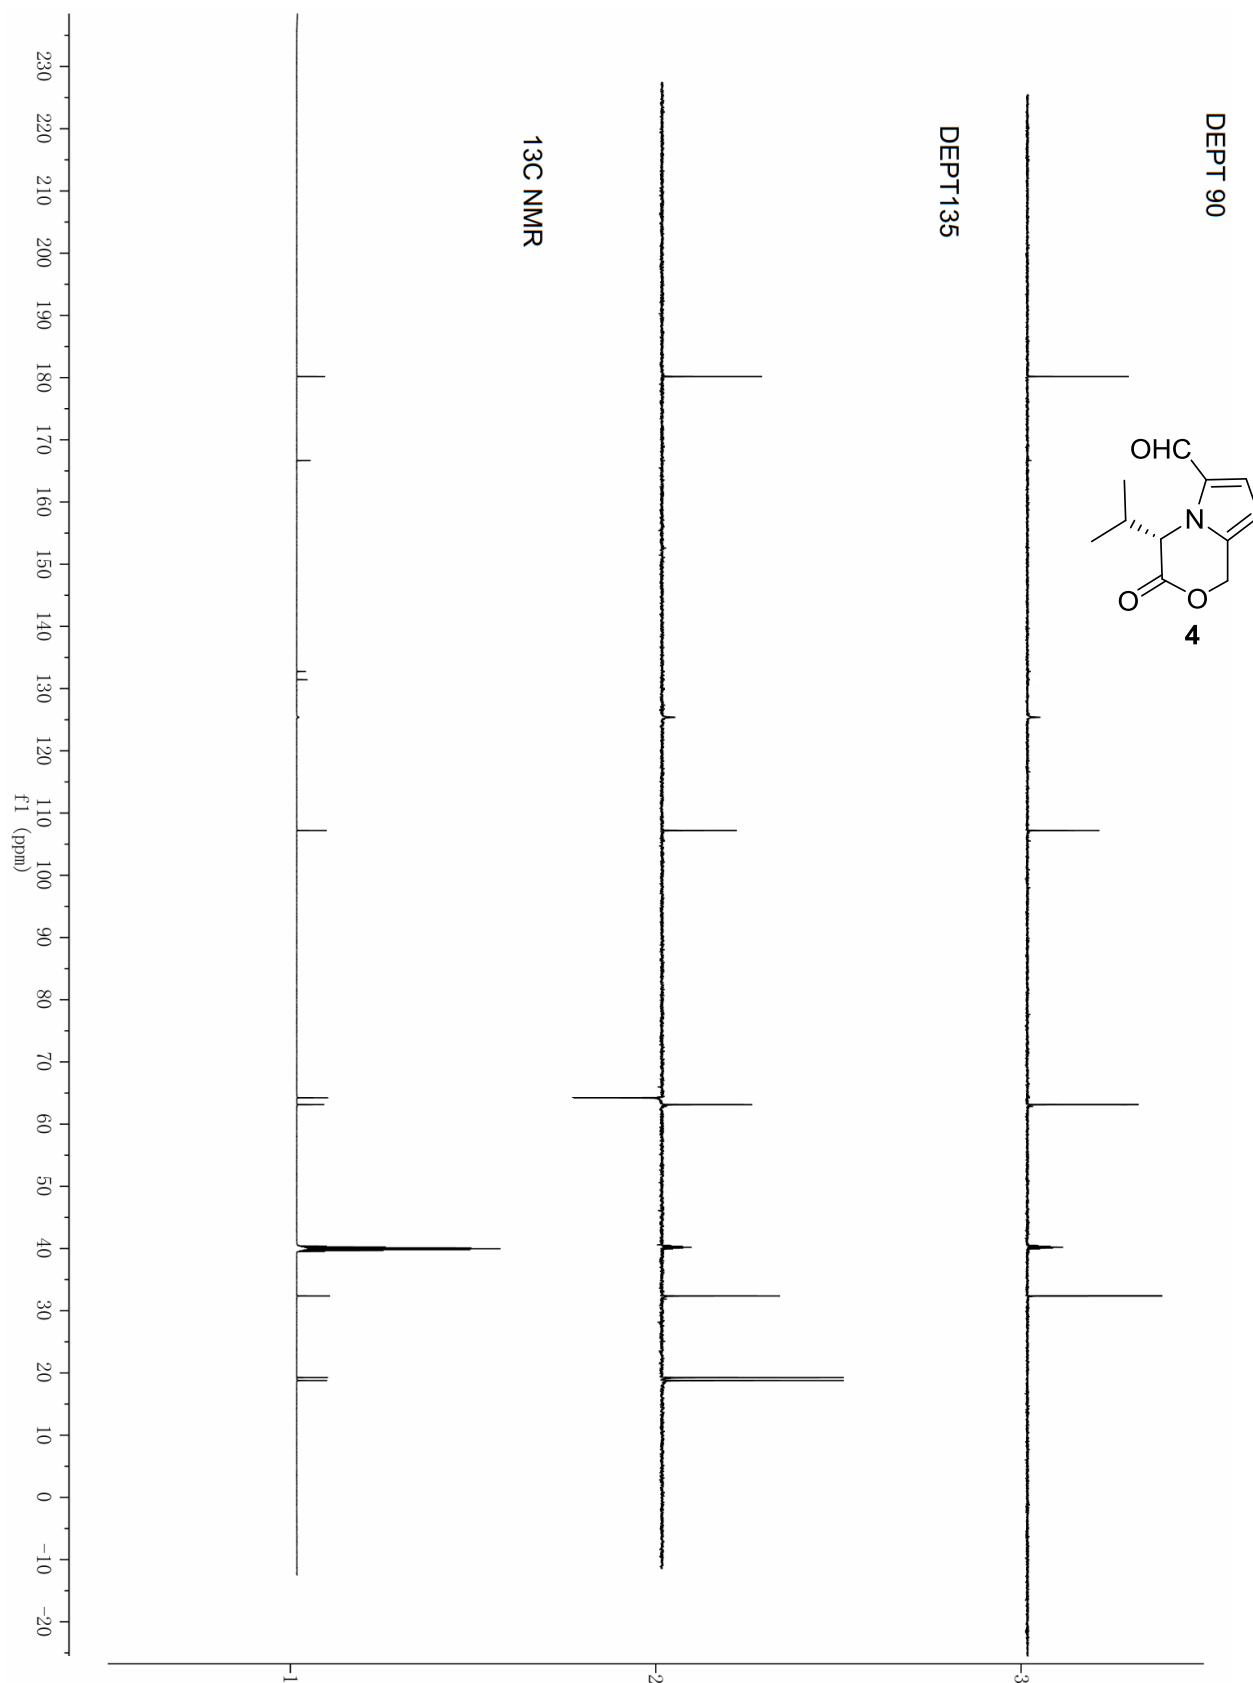



**Figure S27.** The DEPTQ (150 MHz, DMSO-*d*<sub>6</sub>) spectrum of compound **5**.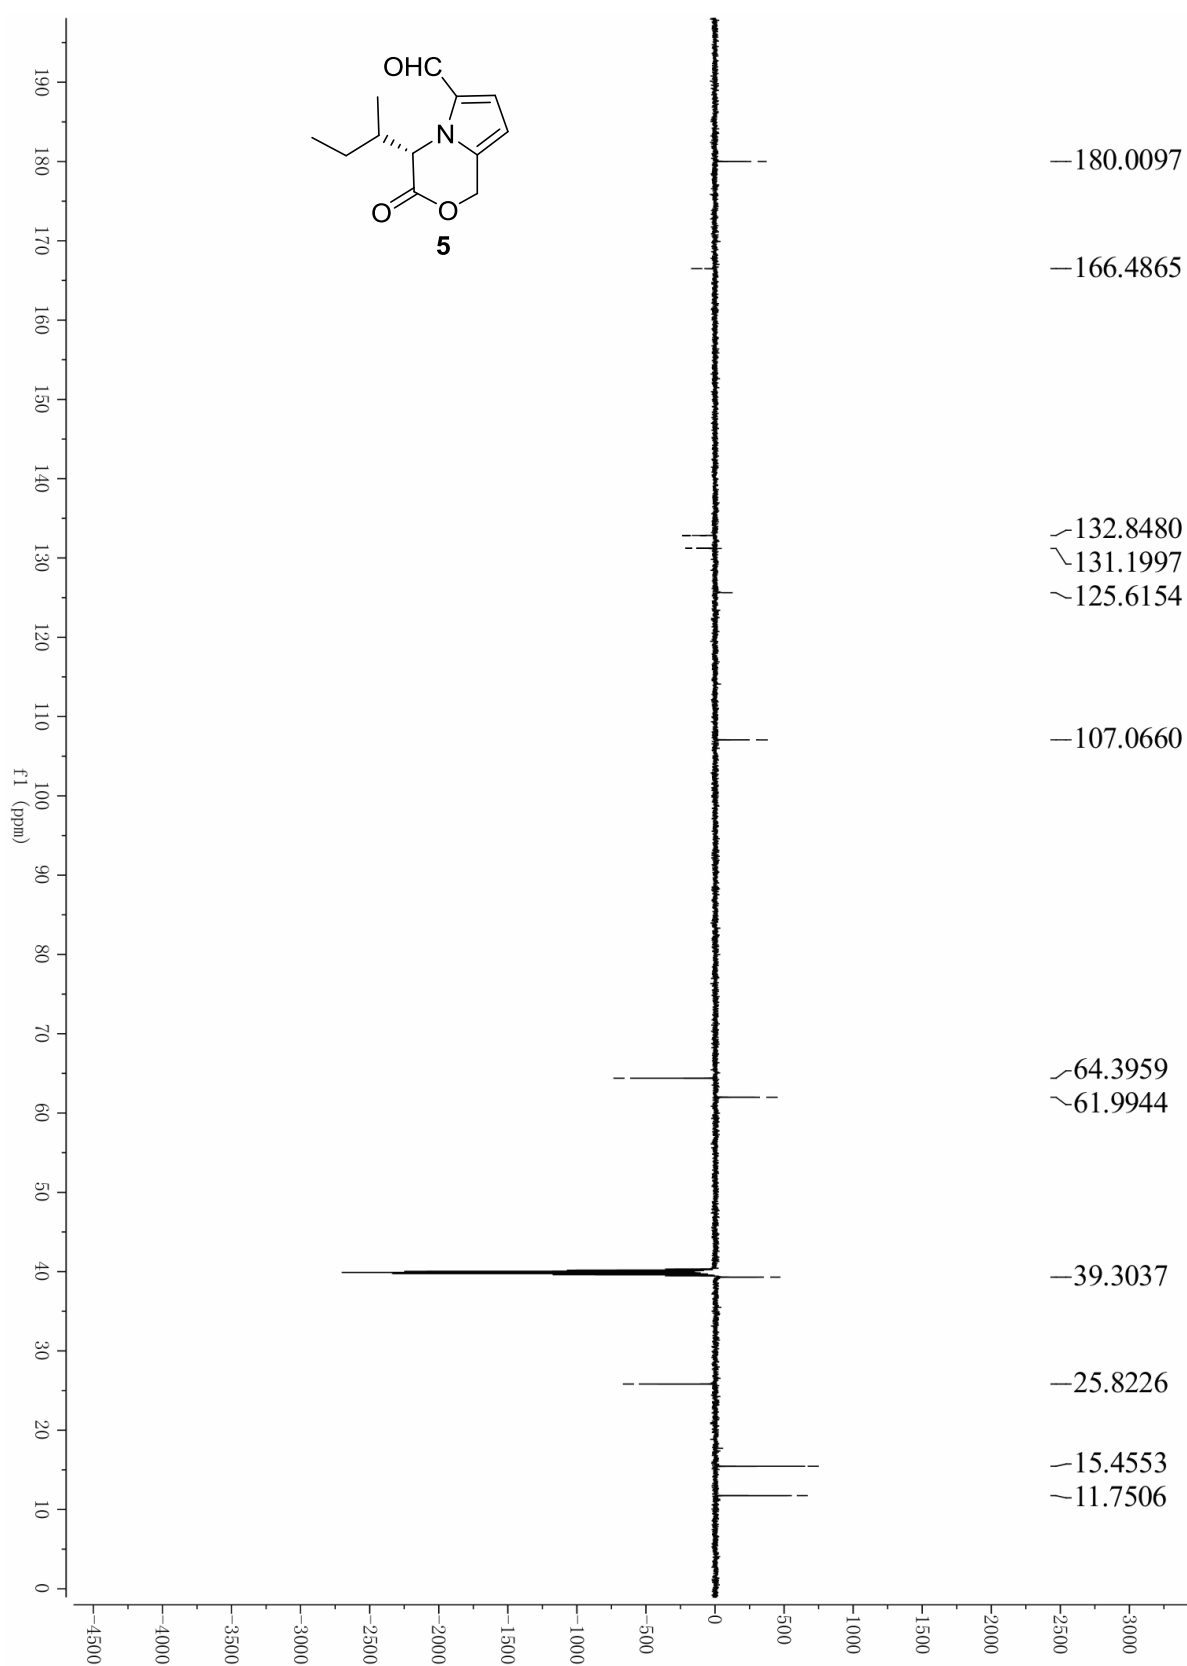

**Figure S28.** The  $^1\text{H}$  NMR (600 MHz,  $\text{DMSO-}d_6$ ) spectrum of compound **6**.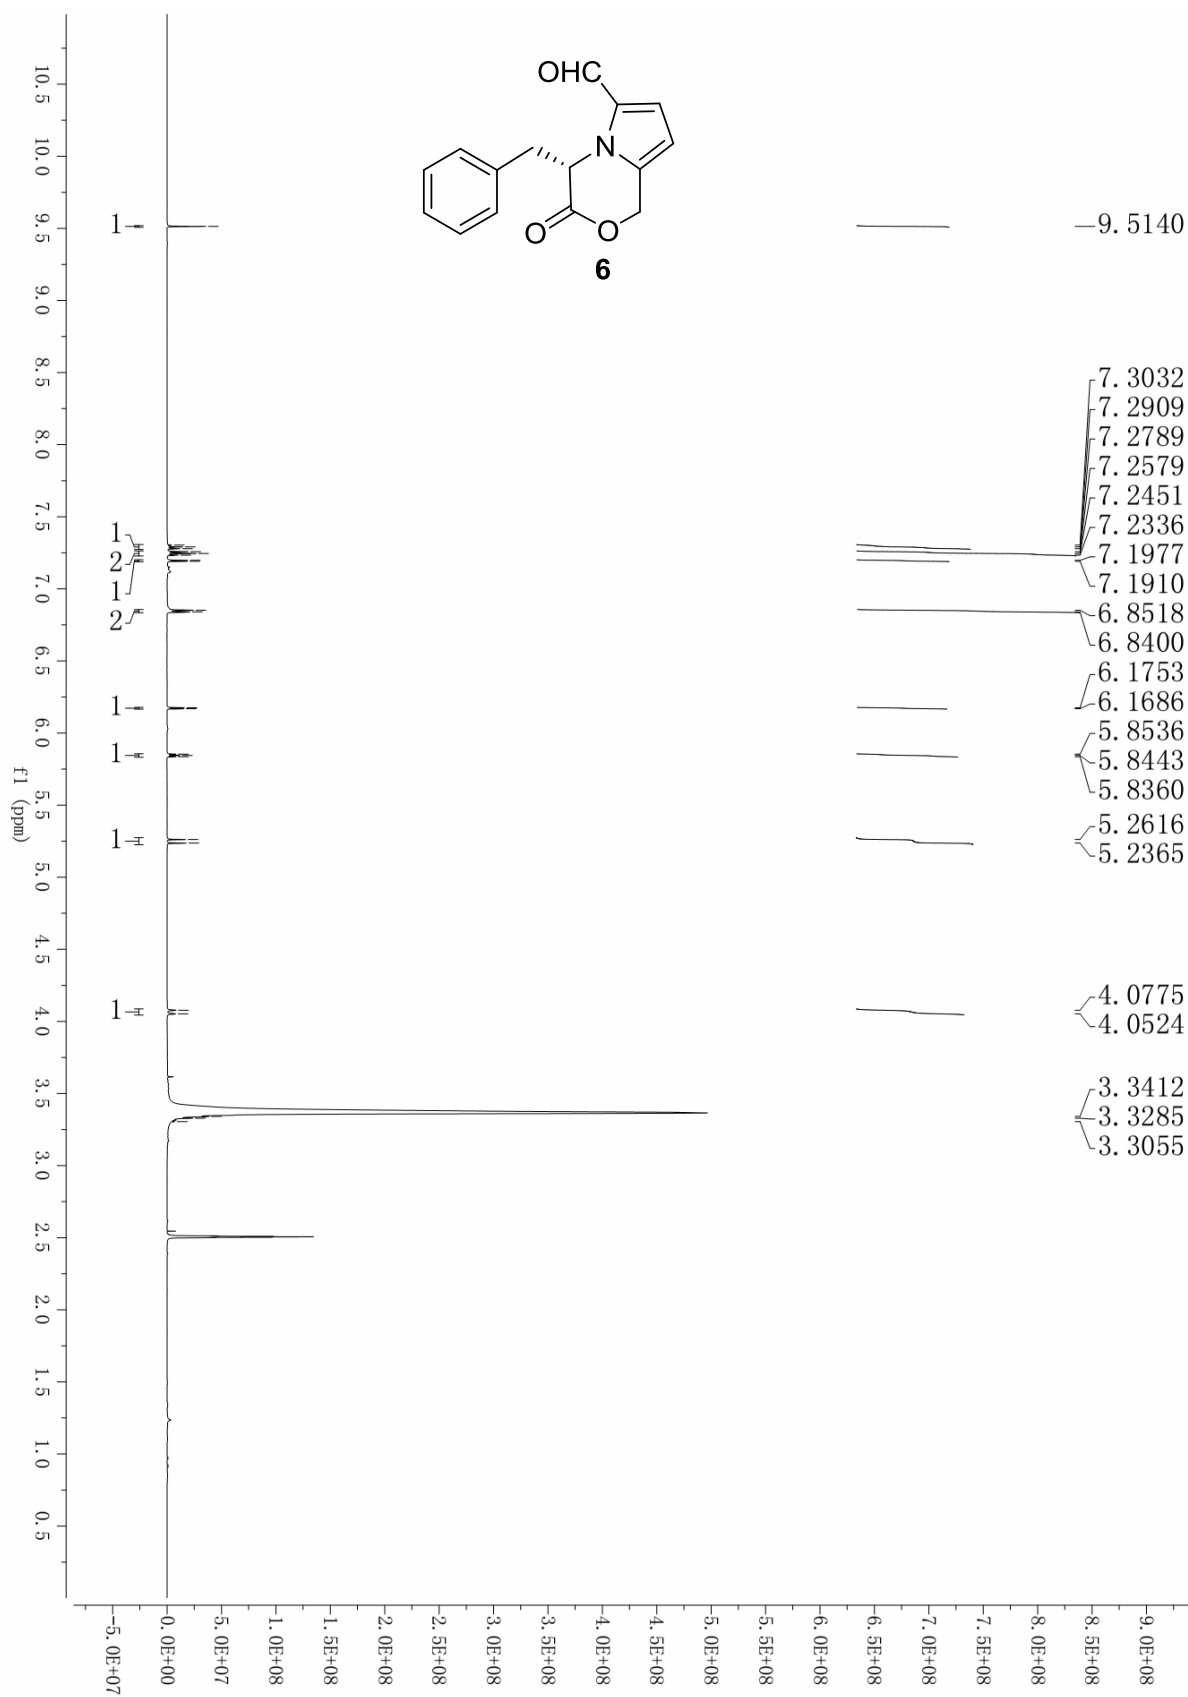

**Figure S29.** The  $^{13}\text{C}$  NMR (150 MHz,  $\text{DMSO-}d_6$ ) spectrum of compound **6**.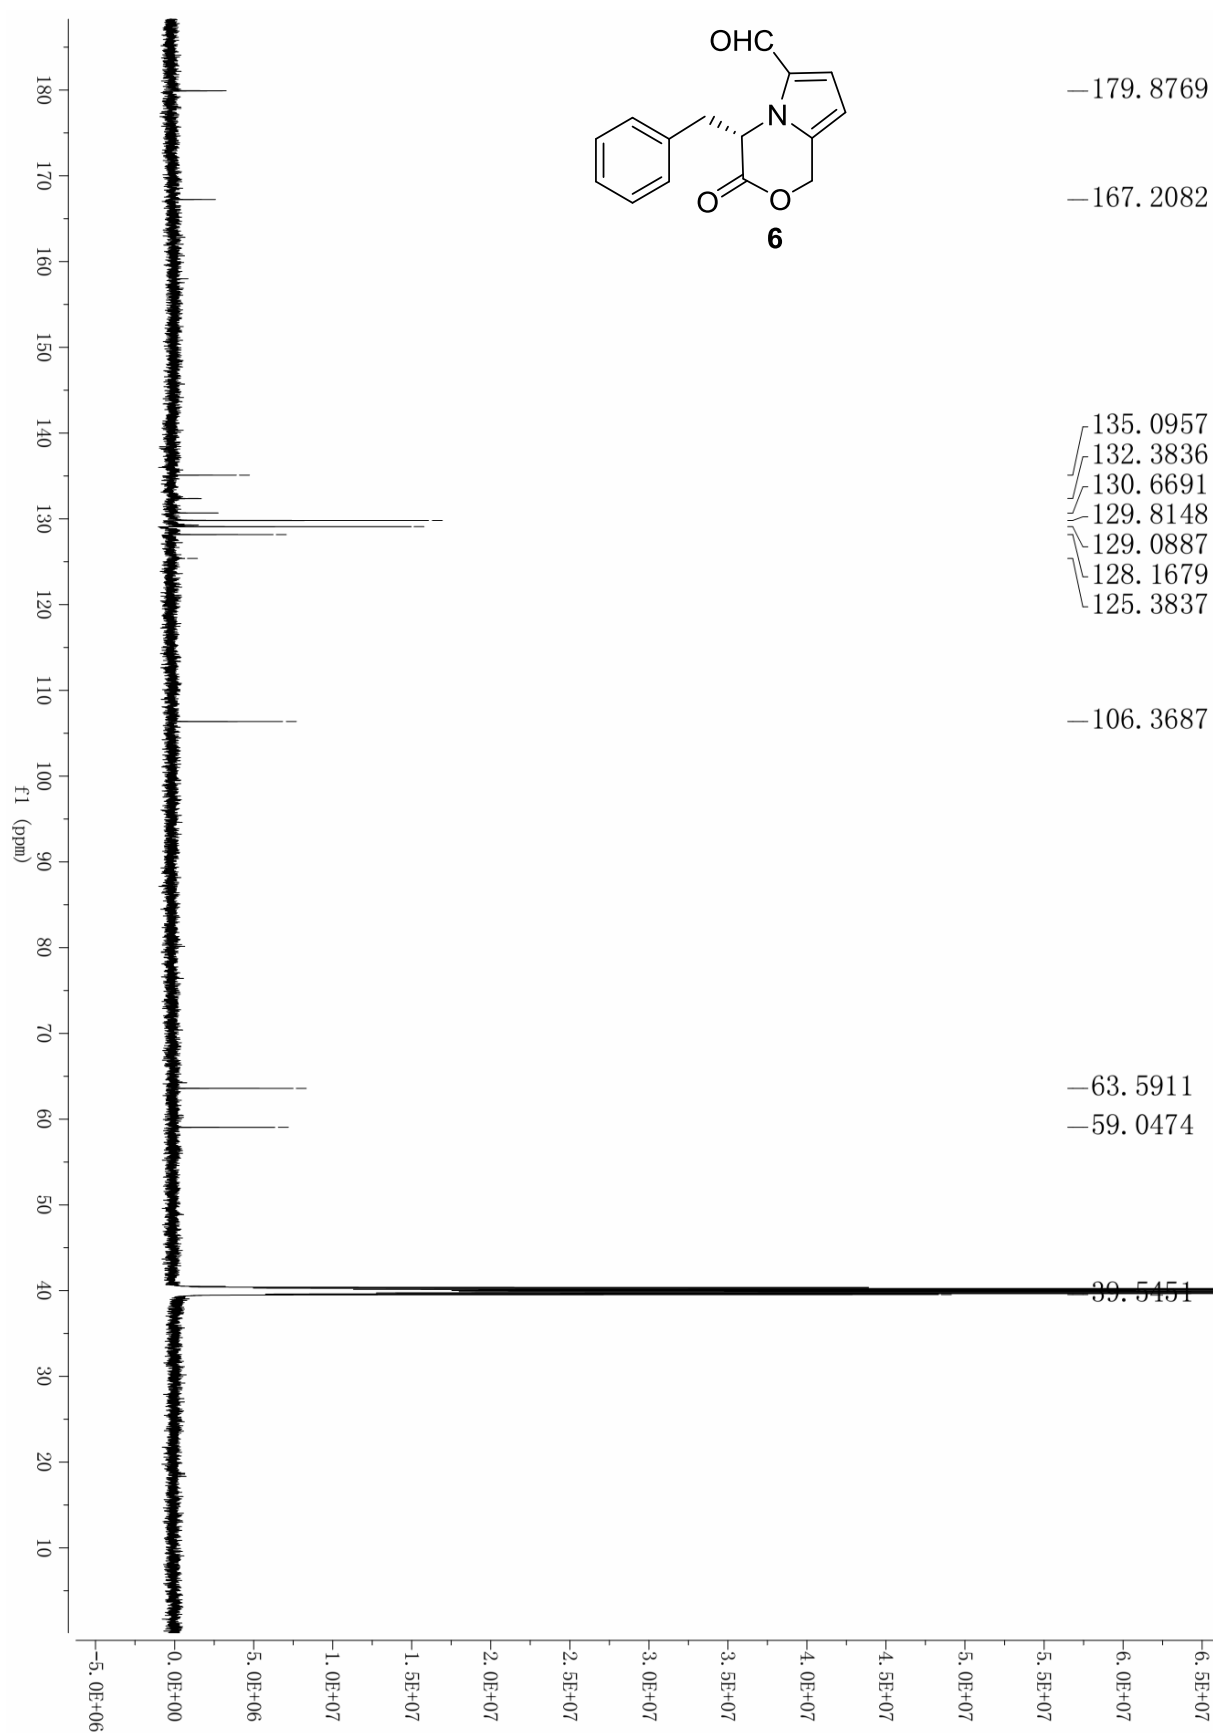

**Figure S30.** The DEPT (150 MHz, DMSO-*d*<sub>6</sub>) spectrum of compound **6**.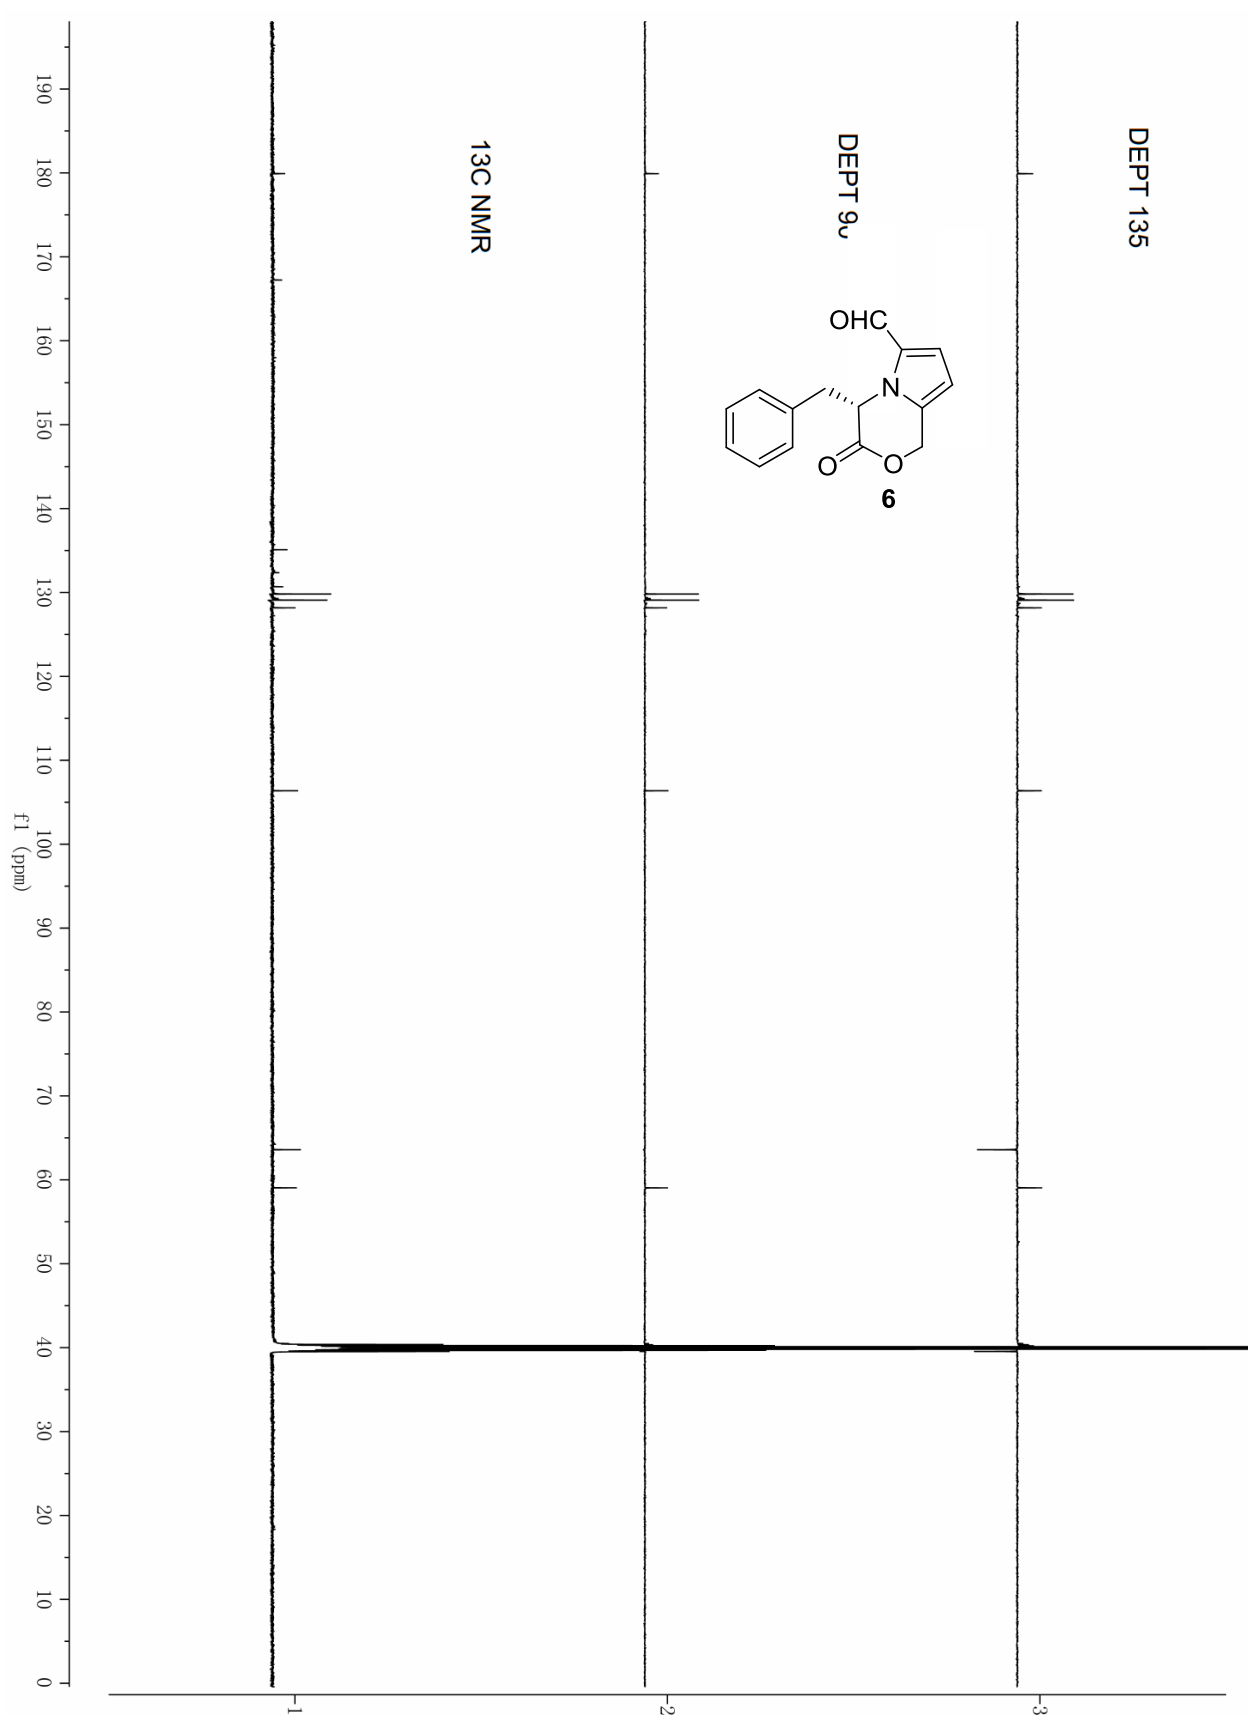



**Table S1.** Anti-H1N1 virus activities of 1–13.

| Compounds | MDCK                     | H1N1                     |                 |
|-----------|--------------------------|--------------------------|-----------------|
|           | CC <sub>50</sub> (µg/mL) | IC <sub>50</sub> (µg/mL) | SI              |
| 1         | ND <sup>a</sup>          | >50                      | ND <sup>a</sup> |
| 2         | ND <sup>a</sup>          | >50                      | ND <sup>a</sup> |
| 3         | ND <sup>a</sup>          | >50                      | ND <sup>a</sup> |
| 4         | ND <sup>a</sup>          | >50                      | ND <sup>a</sup> |
| 5         | ND <sup>a</sup>          | >50                      | ND <sup>a</sup> |
| 6         | ND <sup>a</sup>          | >50                      | ND <sup>a</sup> |
| 7         | ND <sup>a</sup>          | >50                      | ND <sup>a</sup> |
| 8         | 116.3 ± 12.1             | 38.3 ± 1.2               | 3.0             |
| 9         | 403.2 ± 31.4             | 25.0 ± 3.6               | 16.1            |
| 10        | 124.1 ± 10.5             | 39.7 ± 5.6               | 3.1             |
| 11        | 522.5 ± 24.5             | 45.9 ± 2.1               | 11.4            |
| 12        | ND <sup>a</sup>          | >50                      | ND <sup>a</sup> |
| 13        | ND <sup>a</sup>          | >50                      | ND <sup>a</sup> |
| Ribavirin | 744.2 ± 18.5             | 23.1 ± 1.7               | 32.2            |

<sup>a</sup> Not detected.**Table S2.** The 2D NMR data for compounds 1–3.

| Position | 1                                      |                     |          | 2                                      |                  |          | Position | 3                                      |               |
|----------|----------------------------------------|---------------------|----------|----------------------------------------|------------------|----------|----------|----------------------------------------|---------------|
|          | <sup>1</sup> H- <sup>1</sup> H<br>COSY | HMBC                | NOESY    | <sup>1</sup> H- <sup>1</sup> H<br>COSY | HMBC             | NOEY     |          | <sup>1</sup> H- <sup>1</sup> H<br>COSY | HMBC          |
| 1        |                                        |                     |          |                                        |                  |          | 1        |                                        |               |
| 2        |                                        |                     |          |                                        |                  |          | 2        |                                        |               |
| 3        |                                        | 2', 2, 5            |          | 6                                      | 2, 5             |          | 3        |                                        | 2, 8, 11,12   |
| 4        |                                        |                     |          |                                        |                  |          | 4        |                                        |               |
| 5        |                                        | 1'', 3, 6           | 1'', 2'' |                                        |                  |          | 5        |                                        |               |
| 6        |                                        |                     |          | 3                                      | 2, 5, 1''        | 1'', 2'' | 6        | 7                                      | 5, 7, 8, 10   |
| 1'       |                                        |                     |          |                                        |                  |          | 7        |                                        | 5, 6, 8, 9    |
| 2'       |                                        |                     |          |                                        |                  |          | 8        |                                        |               |
| 3'       | 4'                                     | 2', 4', 5'          |          | 4'                                     | 2, 2', 4', 5     |          | 9        |                                        | 2, 6, 7, 8    |
| 4'       | 3', 5'                                 | 2', 3', 5'          |          | 3', 5'                                 | 2', 3', 5'       |          | 10       |                                        | 5             |
| 5'       | 4'                                     | 2', 3'              |          | 4'                                     | 2', 3', 4'       |          | 11       | 3, 12,                                 | 2, 3, 12, 13  |
| 1''      | 2''                                    | 5, 6, 2'', 3''      | 3'', 4'' | 2''                                    | 5, 6, 2'', 3''   | 3'', 4'' | 12       | 11, 13, 14                             | 3, 11, 13, 14 |
| 2''      | 1'', 3''                               | 1'', 3'', 4'', 5, 6 | 5, 4''   | 1'', 3''                               | 5, 1'', 3'', 4'' | 5, 4''   | 13       | 12                                     | 11, 12, 14    |
| 3''      | 2'', 4''                               | 1'', 2'', 4''       | 1''      | 1'', 4''                               | 1'', 2'', 4''    | 1''      | 14       | 12                                     | 11, 12, 13    |
| 4''      | 3''                                    | 2'', 3''            | 1'', 2'' | 3''                                    | 2'', 3''         | 1''      |          |                                        |               |
